# Supplementary material for: Computational Analysis of CD46 Protein Interaction with SARS-CoV-2 Structural Proteins: Elucidating a Putative Viral Entry Mechanism into Human Cells
Source: MDPI journal article supplement (doi:10.3390/v15122297), 2023-11-23
Supplement: s1 [file s1]

**Table S1.** Main characteristics of relevant target proteins.

| Protein <sup>1</sup> | Gene <sup>2</sup> | Code <sup>3</sup> | Name <sup>4</sup>               | Organism     | Length <sup>5</sup> |
|----------------------|-------------------|-------------------|---------------------------------|--------------|---------------------|
| CD46                 | CD46              | P15529            | Membrane cofactor protein       | Homo sapiens | 392                 |
| EP                   | E                 | P0DTC4            | Envelope small membrane protein | SARS-CoV-2   | 75                  |
| MP                   | M                 | P0DTC5            | Membrane protein                | SARS-CoV-2   | 222                 |
| NP                   | N                 | P0DTC9            | Nucleoprotein                   | SARS-CoV-2   | 419                 |
| SP                   | S                 | P0DTC2            | Spike glycoprotein              | SARS-CoV-2   | 1273                |

Note.1. Generally accepted protein abbreviation; 2. Gene's nomenclatural designation; 3. Common protein code recommended by UniProt.; 4. Nomenclature name recommended by UniProt.; 5. Length of the primary sequence in amino acid residues.

**Table S2.** Experimental 3D models of relevant target proteins.

| Protein | PDB Code                                                                                                                                                                                                                                                                                                                                                                                                                                                                                                                                                                                                                                                                                                                                                                                                                                                                                                                                                                                                                                                                                                                                                                                                                                                                                                                                                                                                                                                                                                                                                                                                                                                                                                         |
|---------|------------------------------------------------------------------------------------------------------------------------------------------------------------------------------------------------------------------------------------------------------------------------------------------------------------------------------------------------------------------------------------------------------------------------------------------------------------------------------------------------------------------------------------------------------------------------------------------------------------------------------------------------------------------------------------------------------------------------------------------------------------------------------------------------------------------------------------------------------------------------------------------------------------------------------------------------------------------------------------------------------------------------------------------------------------------------------------------------------------------------------------------------------------------------------------------------------------------------------------------------------------------------------------------------------------------------------------------------------------------------------------------------------------------------------------------------------------------------------------------------------------------------------------------------------------------------------------------------------------------------------------------------------------------------------------------------------------------|
| CD46    | 1CKL, 2O39, 3INB, 3L89, 3O8E, 5F08                                                                                                                                                                                                                                                                                                                                                                                                                                                                                                                                                                                                                                                                                                                                                                                                                                                                                                                                                                                                                                                                                                                                                                                                                                                                                                                                                                                                                                                                                                                                                                                                                                                                               |
| EP      | 7K3G                                                                                                                                                                                                                                                                                                                                                                                                                                                                                                                                                                                                                                                                                                                                                                                                                                                                                                                                                                                                                                                                                                                                                                                                                                                                                                                                                                                                                                                                                                                                                                                                                                                                                                             |
| MP      | —                                                                                                                                                                                                                                                                                                                                                                                                                                                                                                                                                                                                                                                                                                                                                                                                                                                                                                                                                                                                                                                                                                                                                                                                                                                                                                                                                                                                                                                                                                                                                                                                                                                                                                                |
| NP      | 6M3M, 6VYO, 6WJI, 6WKP, 6WZO, 6WZQ, 6YI3, 6YUN, 6ZCO, 7ACS, 7ACT, 7C22, 7CDZ, 7CE0, 7DE1, 7KGO, 7KGP, 7KGQ, 7KGR, 7KGT, 7RGS<br><br>6LVN, 6LXT, 6LZG, 6MO5, 6M17, 6M1V, 6VSB, 6VW1, 6VXX, 6VYB, 6W41, 6WPS, 6WPT, 6X29, 6X2A, 6X2B, 6X2C, 6X6P, 6X79, 6XC2, 6XC3, 6XC4, 6XC7, 6XCM, 6XCN, 6XDG, 6XE1, 6XEY, 6XF5, 6XF6, 6XKL, 6XKP, 6XKQ, 6XLU, 6XMO, 6XM3, 6XM4, 6XM5, 6XR8, 6XRA, 6XS6, 6YLA, 6YM0, 6YOR, 6YZ5, 6YZ7, 6Y2M, 6Z43, 6Z97, 6ZB4, 6ZB5, 6ZBP, 6ZCZ, 6ZDG, 6ZDH, 6ZER, 6ZFO, 6ZGE, 6ZGG, 6ZGI, 6ZH9, 6ZHD, 6ZLR, 6ZOW, 6ZOX, 6ZOY, 6ZOZ, 6ZP0, 6ZP1, 6ZP2, 6ZP5, 6ZP7, 6ZWV, 6ZXN, 7A25, 7A29, 7A4N, 7A5R, 7A5S, 7A91, 7A92, 7A93, 7A94, 7A95, 7A96, 7A97, 7A98, 7AD1, 7B17, 7BEH, 7BEI, 7BEJ, 7BEK, 7BEL, 7BEM, 7BEN, 7BEO, 7BEP, 7BWJ, 7BYR, 7BZS, 7C01, 7C2L, 7C8D, 7C8J, 7C8V, 7C8W, 7CAB, 7CAC, 7CAH, 7CAI, 7CAK, 7CAN, 7CDI, 7CDJ, 7CH4, 7CH5, 7CHB, 7CHC, 7CHE, 7CHF, 7CHH, 7CJF, 7CM4, 7CN9, 7CT5, 7CWL, 7CWM, 7CWN, 7CWO, 7CWS, 7CWU, 7D2Z, 7D30, 7DCC, 7DCX, 7DD2, 7DD8, 7DDD, 7DDN, 7DF3, 7DF4, 7DK3, 7DK4, 7DK5, 7DK6, 7DK7, 7DMU, 7DPM, 7JJC, 7JJI, 7JJJ, 7JMO, 7JMP, 7JMW, 7JV2, 7JV4, 7JV6, 7JVA, 7JVB, 7JVC, 7JW0, 7JWB, 7JWY, 7JX3, 7JZL, 7JZM, 7JZN, 7JZU, 7K43, 7K45, 7K4N, 7K8M, 7K8S, 7K8T, 7K8U, 7K8V, 7K8W, 7K8X, 7K8Y, 7K8Z, 7K90, 7K9Z, 7KDG, 7KDH, 7KDI, 7KDJ, 7KDK, 7KDL, 7KE4, 7KE6, 7KE7, 7KE8, 7KE9, 7KEA, 7KEB, 7KEC, 7KGJ, 7KGK, 7KJ2, 7KJ3, 7KJ4, 7KJ5, 7KKK, 7KKL, 7KL9, 7KLG, 7KLH, 7KLW, 7KMB, 7KMG, 7KMH, 7KMI, 7KMK, 7KML, 7KMS, 7KMZ, 7KN5, 7KN6, 7KN7, 7KNB, 7KNE, 7KNH, 7KHI, 7KS9, 7KSG, 7KSJ, 7KXK, 7KZB, 7L02, 7L06, 7L09, 7L0N, 7L2C, 7L3N, 7L5B, 7L7F, 7L7K, 7LCN, 7LD1, 7LOP, 7ND3, 7ND4, 7ND5, 7ND6, 7ND7, 7ND8, 7ND9, 7NDA, 7NDB, 7NDC, 7NDD, 7NEH |

**Table S3.** Adequate resolved isolated subunits of experimental 3D models of human CD46 membrane cofactor protein.

| <b>PDB Code</b> | <b>Chain <sup>1</sup></b> | <b>Designation <sup>2</sup></b> | <b>Length <sup>3</sup></b> | <b>Range <sup>4</sup></b> |
|-----------------|---------------------------|---------------------------------|----------------------------|---------------------------|
| 1CKL            | A                         | CD46_1CKL-A                     | 126                        | 35-160                    |
| 1CKL            | B                         | CD46_1CKL-B                     | 126                        | 35-160                    |
| 1CKL            | C                         | CD46_1CKL-C                     | 126                        | 35-160                    |
| 1CKL            | D                         | CD46_1CKL-D                     | 126                        | 35-160                    |
| 1CKL            | E                         | CD46_1CKL-E                     | 126                        | 35-160                    |
| 1CKL            | F                         | CD46_1CKL-F                     | 126                        | 35-160                    |
| 2O39            | C                         | CD46_2O39-C                     | 126                        | 35-160                    |
| 2O39            | D                         | CD46_2O39-D                     | 126                        | 35-160                    |
| 3INB            | C                         | CD46_3INB-C                     | 126                        | 35-160                    |
| 3INB            | D                         | CD46_3INB-D                     | 126                        | 35-160                    |
| 3L89            | M                         | CD46_3L89-M                     | 126                        | 35-160                    |
| 3L89            | N                         | CD46_3L89-N                     | 126                        | 35-160                    |
| 3L89            | O                         | CD46_3L89-O                     | 126                        | 35-160                    |
| 3L89            | P                         | CD46_3L89-P                     | 126                        | 35-160                    |
| 3L89            | Q                         | CD46_3L89-Q                     | 125                        | 35-160                    |
| 3L89            | R                         | CD46_3L89-R                     | 126                        | 35-160                    |
| 3L89            | S                         | CD46_3L89-S                     | 126                        | 35-160                    |
| 3L89            | T                         | CD46_3L89-T                     | 124                        | 35-160                    |
| 3L89            | U                         | CD46_3L89-U                     | 126                        | 35-160                    |
| 3L89            | V                         | CD46_3L89-V                     | 126                        | 35-160                    |
| 3L89            | W                         | CD46_3L89-W                     | 125                        | 35-160                    |
| 3L89            | X                         | CD46_3L89-X                     | 126                        | 35-160                    |
| 3O8E            | B                         | CD46_3O8E-B                     | 252                        | 35-286                    |
| 3O8E            | D                         | CD46_3O8E-D                     | 248                        | 35-286                    |
| 5FO8            | C                         | CD46_5FO8-C                     | 129                        | 158-286                   |

Note. 1. According to their designations in the original 3D model. 2. Designation of the isolated resolved subunit and the name of the pdb file containing this subunit. 3. Length of the isolated resolved subunit in amino acid residues. 4. The starting and ending numbers of the amino acids in the continuous resolved sequence.

**Table S4.** Adequate resolved isolated subunits of experimental 3D models of SARS-CoV-2<sup>1</sup> envelope protein (EP).

| <b>PDB Code</b> | <b>Chain</b> | <b>Designation</b> | <b>Length</b> | <b>Range</b> |
|-----------------|--------------|--------------------|---------------|--------------|
| 7K3G            | A            | EP_7K3G-A          | 31            | 8-38         |
| 7K3G            | B            | EP_7K3G-B          | 31            | 8-38         |
| 7K3G            | C            | EP_7K3G-C          | 31            | 8-38         |
| 7K3G            | D            | EP_7K3G-D          | 31            | 8-38         |
| 7K3G            | E            | EP_7K3G-E          | 31            | 8-38         |

Note. 1. The column designations correspond to Table S3.

**Table S5.** Adequate resolved isolated subunits of experimental 3D models of SARS-CoV-2<sup>1</sup> nucleocapsid protein (NP).

| <b>PDB Code</b> | <b>Chain</b> | <b>Designation</b> | <b>Length</b> | <b>Range</b> |
|-----------------|--------------|--------------------|---------------|--------------|
| 6M3M            | A            | NP_6M3M-A_102-174  | 73            | 102-174      |
| 6M3M            | A            | NP_6M3M-A_49-96    | 48            | 49-96        |
| 6M3M            | B            | NP_6M3M-B_48-97    | 50            | 48-97        |
| 6M3M            | B            | NP_6M3M-B_99-174   | 76            | 99-174       |
| 6M3M            | C            | NP_6M3M-C_47-96    | 50            | 47-96        |
| 6M3M            | C            | NP_6M3M-C_98-173   | 76            | 98-173       |
| 6M3M            | D            | NP_6M3M-D_101-174  | 74            | 101-174      |
| 6M3M            | D            | NP_6M3M-D_48-99    | 52            | 48-99        |
| 6VYO            | D            | NP_6VYO-D          | 125           | 49-173       |
| 6WJI            | A            | NP_6WIJ-A          | 108           | 257-364      |
| 6WJI            | B            | NP_6WIJ-B          | 108           | 257-364      |
| 6WJI            | C            | NP_6WIJ-C          | 108           | 257-364      |
| 6WJI            | D            | NP_6WIJ-D          | 108           | 257-364      |
| 6WJI            | E            | NP_6WIJ-E          | 108           | 257-364      |
| 6WJI            | F            | NP_6WIJ-F          | 108           | 257-364      |
| 6WZO            | A            | NP_6WZO-A          | 108           | 257-364      |
| 6WZO            | B            | NP_6WZO-B          | 111           | 254-364      |
| 6WZO            | C            | NP_6WZO-C          | 108           | 257-364      |
| 6WZO            | D            | NP_6WZO-D          | 110           | 255-364      |
| 6WZQ            | A            | NP_6WZQ-A          | 114           | 251-364      |
| 6WZQ            | B            | NP_6WZQ-B          | 114           | 251-364      |
| 6WZQ            | C            | NP_6WZQ-C          | 116           | 249-364      |
| 6WZQ            | D            | NP_6WZQ-D          | 115           | 250-364      |
| 6YI3            | A            | NP_6YI3-A          | 137           | 44-180       |
| 6YUN            | A            | NP_6YUN-A          | 116           | 249-364      |

|      |   |           |     |         |
|------|---|-----------|-----|---------|
| 6YUN | B | NP_6YUN-B | 118 | 247-364 |
| 6ZCO | A | NP_6ZCO-A | 118 | 247-364 |
| 7ACS | A | NP_7ACS-A | 137 | 44-180  |
| 7ACT | A | NP_7ACT-A | 137 | 44-180  |
| 7C22 | A | NP_7C22-A | 109 | 256-364 |
| 7C22 | B | NP_7C22-B | 113 | 252-364 |
| 7C22 | C | NP_7C22-C | 112 | 253-364 |
| 7C22 | D | NP_7C22-D | 108 | 257-364 |
| 7CDZ | A | NP_7CDZ-A | 128 | 4-131   |
| 7CDZ | B | NP_7CDZ-B | 127 | 4-130   |
| 7CDZ | C | NP_7CDZ-C | 126 | 5-130   |
| 7CDZ | D | NP_7CDZ-D | 127 | 5-131   |
| 7CE0 | A | NP_7CE0-A | 110 | 255-364 |
| 7CE0 | B | NP_7CE0-B | 110 | 255-364 |
| 7CE0 | C | NP_7CE0-C | 110 | 255-364 |
| 7CE0 | D | NP_7CE0-D | 110 | 255-364 |
| 7DE1 | A | NP_7DE1-A | 108 | 257-364 |
| 7DE1 | B | NP_7DE1-B | 115 | 250-364 |

Note. 1. The column designations correspond to Table S3.

**Table S6.** Adequate resolved isolated subunits of experimental 3D models of SARS-CoV-2 <sup>1</sup> spike protein (SP).

| PDB Code | Chain | Designation | Length | Range   |
|----------|-------|-------------|--------|---------|
| 6XR8     | A     | SP_6XR8-A   | 1107   | 14-1162 |
| 6XR8     | B     | SP_6XR8-B   | 1107   | 14-1162 |
| 6XR8     | C     | SP_6XR8-C   | 1107   | 14-1162 |
| 6ZWV     | A     | SP_6ZWV-A   | 985    | 27-1151 |
| 6ZWV     | B     | SP_6ZWV-B   | 985    | 27-1151 |
| 6ZWV     | C     | SP_6ZWV-C   | 985    | 27-1151 |
| 7DDD     | A     | SP_7DDD-A   | 1088   | 14-1147 |
| 7DDD     | B     | SP_7DDD-B   | 1088   | 14-1147 |
| 7DDD     | C     | SP_7DDD-C   | 1088   | 14-1147 |
| 7JJI     | A     | SP_7JJI-A   | 1109   | 14-1146 |
| 7JJI     | B     | SP_7JJI-B   | 1109   | 14-1146 |
| 7JJI     | C     | SP_7JJI-C   | 1109   | 14-1146 |
| 7L7K     | A     | SP_7L7K-A   | 973    | 27-1146 |
| 7L7K     | B     | SP_7L7K-B   | 973    | 27-1146 |
| 7L7K     | C     | SP_7L7K-C   | 973    | 27-1146 |

Note. 1. Column designations correspond to Table S3.

**Table S7.** Validity indicators of adequate resolved isolated subunits from experimental 3D models of human CD46 membrane cofactor protein.

| Designation <sup>1</sup> | QMEAN4 <sup>2</sup> | Designation <sup>1</sup> | QMEAN4 <sup>2</sup> |
|--------------------------|---------------------|--------------------------|---------------------|
| CD46_1CKL-A              | -4.95               | CD46_3L89-P              | -0.47               |
| CD46_1CKL-B              | -0.66               | CD46_3L89-Q              | -1.37               |
| CD46_1CKL-C              | -3.40               | CD46_3L89-R              | -0.05               |
| CD46_1CKL-D              | -2.09               | CD46_3L89-S              | -0.44               |
| CD46_1CKL-E              | -1.62               | CD46_3L89-T              | -0.37               |
| CD46_1CKL-F              | -0.50               | CD46_3L89-U              | 0.16                |
| CD46_2O39-C              | -1.39               | CD46_3L89-V              | -0.68               |
| CD46_2O39-D              | -0.86               | CD46_3L89-W              | -0.53               |
| CD46_3INB-C              | -6.13               | CD46_3L89-X              | -0.18               |
| CD46_3INB-D              | -6.94               | CD46_3O8E-B              | 0.96                |
| CD46_3L89-M              | -0.48               | CD46_3O8E-D              | 1.42                |
| CD46_3L89-N              | -0.73               | CD46_5FO8-C              | 0.08                |
| CD46_3L89-O              | -0.26               |                          |                     |

Note. 1. Designation of the pdb file containing the respective isolated subunit. 2. The validity assessment function for the 3D model [Benkert, 2011].

**Table S8.** Validity Indicators of Adequate Resolved Isolated Subunits from Experimental 3D Models of SARS-CoV-2<sup>1</sup> Envelope Protein (EP).

| Designation | QMEAN4 | Designation | QMEAN4 |
|-------------|--------|-------------|--------|
| EP_7K3G-A   | -2.90  | EP_7K3G-D   | -2.90  |
| EP_7K3G-B   | -2.94  | EP_7K3G-E   | -2.90  |
| EP_7K3G-C   | -2.87  |             |        |

Note. 1. The column designations correspond to Table S7.

**Table S9.** Validity Indicators of Adequate Resolved Isolated Subunits from Experimental 3D Models of SARS-CoV-2 Nucleocapsid Protein (NP).

| Designation       | QMEAN4 | Designation | QMEAN4 | Designation | QMEAN4 |
|-------------------|--------|-------------|--------|-------------|--------|
| NP_6M3M-A_102-174 | 0.17   | NP_6WZO-A   | -0.12  | NP_7C22-B   | 0.12   |
| NP_6M3M-A_49-96   | -1.40  | NP_6WZO-B   | 0.07   | NP_7C22-C   | -0.23  |
| NP_6M3M-B_48-97   | -0.71  | NP_6WZO-C   | 0.07   | NP_7C22-D   | -0.15  |
| NP_6M3M-B_99-174  | -0.17  | NP_6WZO-D   | 0.01   | NP_7CDZ-A   | 0.94   |
| NP_6M3M-C_47-96   | -1.10  | NP_6WZQ-A   | 0.22   | NP_7CDZ-B   | 1.57   |
| NP_6M3M-C_98-173  | -0.74  | NP_6WZQ-B   | 0.10   | NP_7CDZ-C   | 0.83   |
| NP_6M3M-D_101-174 | -0.34  | NP_6WZQ-C   | 0.37   | NP_7CDZ-D   | 1.27   |

|                 |       |           |                        |           |      |
|-----------------|-------|-----------|------------------------|-----------|------|
| NP_6M3M-D_48-99 | -1.20 | NP_6WZQ-D | -0.27                  | NP_7CE0-A | 0.11 |
| NP_6YVO-D       | 1.19  | NP_6YI3-A | not valid <sup>2</sup> | NP_7CE0-B | 0.20 |
| NP_6WIJ-A       | -0.16 | NP_6YUN-A | 0.39                   | NP_7CE0-C | 0.37 |
| NP_6WIJ-B       | -0.19 | NP_6YUN-B | 0.13                   | NP_7CE0-D | 0.26 |
| NP_6WIJ-C       | -0.14 | NP_6ZCO-A | -0.04                  | NP_7DE1-A | 0.00 |
| NP_6WIJ-D       | -0.17 | NP_7ACS-A | not valid <sup>2</sup> | NP_7DE1-B | 0.18 |
| NP_6WIJ-E       | 0.04  | NP_7ACT-A | -3.22                  |           |      |
| NP_6WIJ-F       | -0.16 | NP_7C22-A | -0.25                  |           |      |

Note. 1. The column designations correspond to Table 7. 2. QMEAN values are exceeding the permissible range,

**Table S10.** Validity Indicators of Adequate Resolved Isolated Subunits from Experimental 3D Models of SARS-CoV-2 <sup>1</sup> Spike Protein (SP).

| Designation | QMEAN4 | Designation | QMEAN4 |
|-------------|--------|-------------|--------|
| SP_6XR8-A   | -0.57  | SP_7DDD-C   | -1.68  |
| SP_6XR8-B   | -0.65  | SP_7JJI-A   | 0.87   |
| SP_6XR8-C   | -0.72  | SP_7JJI-B   | 0.91   |
| SP_6ZWV-A   | -1.28  | SP_7JJI-C   | 0.91   |
| SP_6ZWV-B   | -1.26  | SP_7L7K-A   | -2.16  |
| SP_6ZWV-C   | -1.20  | SP_7L7K-D   | -3.33  |
| SP_7DDD-A   | -1.65  | SP_7L7K-C   | -2.15  |
| SP_7DDD-B   | -1.67  |             |        |

Note. 1. The column designations correspond to Table S7.

**Table S11.** Valid Subunits Representing the Experimental 3D Structure of Human CD46 Membrane Cofactor Protein.

| Designation | Length | Range   | QMEAN4 |
|-------------|--------|---------|--------|
| CD46_3L89-R | 126    | 35-160  | -0.05  |
| CD46_3O8E-B | 252    | 35-286  | 0.96   |
| CD46_3O8E-D | 248    | 35-286  | 1.42   |
| CD46_5FO8-C | 129    | 158-286 | 0.08   |

**Table S12.** Valid Subunits Representing the Experimental 3D Structure of SARS-CoV-2 Nucleocapsid Protein (NP).

| Designation | Length | Range   | QMEAN |
|-------------|--------|---------|-------|
| NP_6YVO-D   | 125    | 49-173  | 1.19  |
| NP_6WZQ-C   | 116    | 249-364 | 0.37  |
| NP_6YUN-A   | 116    | 249-364 | 0.39  |
| NP_7CDZ-B   | 127    | 4-130   | 1.57  |
| NP_7CDZ-D   | 127    | 5-131   | 1.27  |
| NP_7CE0-C   | 110    | 255-364 | 0.37  |

**Table S13.** Valid Subunits Representing the Experimental 3D Structure of SARS-CoV-2 Spike Protein (SP).

| Designation | Length | Range   | QMEAN |
|-------------|--------|---------|-------|
| SP_6XR8-A   | 1107   | 14-1162 | -0.57 |
| SP_6XR8-B   | 1107   | 14-1162 | -0.65 |
| SP_6XR8-C   | 1107   | 14-1162 | -0.72 |
| SP_6ZWV-A   | 985    | 27-1151 | -1.28 |
| SP_6ZWV-B   | 985    | 27-1151 | -1.26 |
| SP_6ZWV-C   | 985    | 27-1151 | -1.20 |
| SP_7DDD-A   | 1088   | 14-1147 | -1.65 |
| SP_7DDD-B   | 1088   | 14-1147 | -1.67 |
| SP_7DDD-C   | 1088   | 14-1147 | -1.68 |
| SP_7JJI-A   | 1109   | 14-1146 | 0.87  |
| SP_7JJI-B   | 1109   | 14-1146 | 0.91  |
| SP_7JJI-C   | 1109   | 14-1146 | 0.91  |

**Table S14.** Reliability of Homology-Based Full 3D Models of Human CD46 Protein and SARS-CoV-2 Envelope Protein (EP), Membrane Protein (MP), Nucleocapsid Protein

| Protein       | C-score for Model No. |       |       |       |       |
|---------------|-----------------------|-------|-------|-------|-------|
|               | 1                     | 2     | 3     | 4     | 5     |
| Human CD46    | -0.84                 | -3.27 | -2.29 | -3.39 | -3.77 |
| EP SARS-CoV-2 | -0.85                 | -1.66 | -1.01 | -1.05 | -3.90 |
| MP SARS-CoV-2 | -3.35                 | -3.43 | -4.81 | -5.00 | -4.94 |
| NP SARS-CoV-2 | -1.58                 | -1.95 | -3.18 | -2.73 | -3.04 |
| SP SARS-CoV-2 | -2.07                 | -2.12 | -2.37 | -2.61 | -2.69 |

**Table S15.** Ranking of Validity Assessment for Homology-Based Full-Size 3D Models of Human CD46 Protein and SARS-CoV-2 Envelope Protein (EP), Membrane Protein (MP), Nucleocapsid Protein (NP), and Spike Protein (SP).

| Experimental Subunit        | Rank |      |          |    |          |      |      |    |        |       |                       |                     | Rank <sub>Mean</sub> | Rank <sub>Model</sub> |
|-----------------------------|------|------|----------|----|----------|------|------|----|--------|-------|-----------------------|---------------------|----------------------|-----------------------|
|                             | DALI |      | PDBeFold |    | TM-score |      |      |    | FATKAT |       | RSMD <sub>chain</sub> |                     |                      |                       |
|                             | Z    | RSMD | Q        | P  | Z        | RSMD | RSMD | TM | p      | Score |                       | RSMD <sub>opt</sub> |                      |                       |
| Human CD46 Membrane Protein |      |      |          |    |          |      |      |    |        |       |                       |                     |                      |                       |
| Model1                      |      |      |          |    |          |      |      |    |        |       |                       |                     |                      | 8.02                  |
| CD46_3O8E-B                 | 3    | 1    | 1        | 3  | 5        | 1    | 7    | 4  | 1      | 3     | 1                     | 1                   | 2.58                 |                       |
| CD46_3O8E-D                 | 5    | 2    | 4        | 4  | 7        | 4    | 1    | 13 | 1      | 7     | 4                     | 4                   | 4.67                 |                       |
| CD46_5FO8-C                 | 10   | 9    | 9        | 9  | 9        | 9    | 18   | 17 | 1      | 11    | 9                     | 9                   | 10.00                |                       |
| CD46_3L89-R                 | 16   | 13   | 11       | 13 | 13       | 13   | 19   | 14 | 15     | 18    | 18                    | 15                  | 14.83                |                       |
| Model2                      |      |      |          |    |          |      |      |    |        |       |                       |                     |                      | 9.10                  |
| CD46_3O8E-B                 | 4    | 2    | 3        | 1  | 6        | 3    | 9    | 5  | 1      | 2     | 3                     | 3                   | 3.50                 |                       |
| CD46_3O8E-D                 | 7    | 2    | 5        | 2  | 8        | 5    | 3    | 18 | 1      | 6     | 5                     | 5                   | 5.58                 |                       |
| CD46_5FO8-C                 | 9    | 10   | 18       | 14 | 17       | 18   | 20   | 16 | 10     | 10    | 10                    | 10                  | 13.50                |                       |
| CD46_3L89-R                 | 15   | 16   | 13       | 11 | 12       | 14   | 15   | 3  | 16     | 16    | 19                    | 16                  | 13.83                |                       |
| Model3                      |      |      |          |    |          |      |      |    |        |       |                       |                     |                      | 10.06                 |
| CD46_3O8E-B                 | 5    | 7    | 7        | 5  | 1        | 7    | 11   | 1  | 1      | 4     | 7                     | 7                   | 5.25                 |                       |
| CD46_3O8E-D                 | 8    | 7    | 8        | 6  | 2        | 8    | 5    | 20 | 1      | 8     | 8                     | 8                   | 7.42                 |                       |
| CD46_5FO8-C                 | 13   | 12   | 19       | 14 | 19       | 19   | 13   | 19 | 12     | 14    | 12                    | 12                  | 14.83                |                       |
| CD46_3L89-R                 | 14   | 13   | 12       | 12 | 11       | 11   | 14   | 6  | 14     | 17    | 16                    | 13                  | 12.75                |                       |
| Model4                      |      |      |          |    |          |      |      |    |        |       |                       |                     |                      | 8.56                  |
| CD46_3O8E-B                 | 1    | 2    | 2        | 7  | 3        | 2    | 10   | 2  | 1      | 1     | 2                     | 2                   | 2.92                 |                       |
| CD46_3O8E-D                 | 2    | 2    | 5        | 8  | 4        | 6    | 4    | 12 | 1      | 5     | 5                     | 5                   | 4.92                 |                       |
| CD46_5FO8-C                 | 10   | 10   | 20       | 14 | 17       | 20   | 17   | 15 | 10     | 12    | 11                    | 11                  | 13.92                |                       |
| CD46_3L89-R                 | 12   | 13   | 10       | 10 | 10       | 12   | 16   | 9  | 13     | 15    | 16                    | 14                  | 12.50                |                       |
| Model5                      |      |      |          |    |          |      |      |    |        |       |                       |                     |                      | 15.08                 |
| CD46_3O8E-B                 | 17   | 19   | 14       | 14 | 15       | 15   | 6    | 8  | 17     | 9     | 14                    | 19                  | 13.92                |                       |
| CD46_3O8E-D                 | 19   | 17   | 16       | 14 | 20       | 16   | 2    | 7  | 19     | 13    | 20                    | 20                  | 15.25                |                       |
| CD46_5FO8-C                 | 20   | 20   | 17       | 14 | 16       | 17   | 12   | 10 | 18     | 19    | 13                    | 18                  | 16.17                |                       |
| CD46_3L89-R                 | 18   | 18   | 15       | 14 | 14       | 10   | 8    | 11 | 20     | 20    | 15                    | 17                  | 15.00                |                       |



| SARS-CoV-2 Envelope Protein (EP)     |   |   |    |    |    |    |    |    |    |    |    |    |       |
|--------------------------------------|---|---|----|----|----|----|----|----|----|----|----|----|-------|
| Model1                               |   |   |    |    |    |    |    |    |    |    |    |    |       |
| EP_7K3G-A                            | — | — | 5  | 4  | 6  | 3  | 7  | 5  | 2  | 2  | 2  | 3  | 3.90  |
| Model2                               |   |   |    |    |    |    |    |    |    |    |    |    |       |
| EP_7K3G-A                            | — | — | 6  | 6  | 7  | 7  | 5  | 7  | 8  | 7  | 8  | 7  | 6.80  |
| Model3                               |   |   |    |    |    |    |    |    |    |    |    |    |       |
| EP_7K3G-A                            | — | — | 4  | 5  | 3  | 4  | 6  | 4  | 5  | 5  | 3  | 2  | 4.10  |
| Model4                               |   |   |    |    |    |    |    |    |    |    |    |    |       |
| EP_7K3G-A                            | — | — | 7  | 7  | 5  | 6  | 4  | 6  | 6  | 6  | 5  | 4  | 5.60  |
| Model5                               |   |   |    |    |    |    |    |    |    |    |    |    |       |
| EP_7K3G-A                            | — | — | 8  | 8  | 8  | 8  | 8  | 8  | 7  | 8  | 7  | 8  | 7.80  |
| QHD43418                             |   |   |    |    |    |    |    |    |    |    |    |    |       |
| EP_7K3G-A                            | — | — | 3  | 3  | 4  | 1  | 3  | 3  | 1  | 1  | 1  | 1  | 2.10  |
| SARS-CoV-2 Nucleocapsid Protein (NP) |   |   |    |    |    |    |    |    |    |    |    |    |       |
| Model1                               |   |   |    |    |    |    |    |    |    |    |    |    |       |
| NP_6WZQ-C                            | — | — | 24 | 16 | 24 | 21 | 34 | 3  | 29 | 27 | 11 | 25 | 21.40 |
| NP_6YUN-A                            | — | — | 32 | 16 | 23 | 23 | 35 | 4  | 26 | 25 | 34 | 29 | 24.70 |
| NP_6YVO-D                            | — | — | 23 | 16 | 25 | 17 | 15 | 1  | 25 | 28 | 20 | 10 | 18.00 |
| NP_7CDZ-B                            | — | — | 26 | 16 | 26 | 16 | 14 | 5  | 30 | 30 | 21 | 18 | 20.20 |
| NP_7CDZ-D                            | — | — | 25 | 16 | 27 | 18 | 16 | 2  | 28 | 29 | 30 | 11 | 20.20 |
| NP_7CE0-C                            | — | — | 27 | 16 | 22 | 24 | 28 | 12 | 27 | 26 | 35 | 30 | 24.70 |
| Model2                               |   |   |    |    |    |    |    |    |    |    |    |    |       |
| NP_6WZQ-C                            | — | — | 18 | 16 | 17 | 31 | 31 | 7  | 36 | 33 | 12 | 36 | 23.70 |
| NP_6YUN-A                            | — | — | 17 | 16 | 28 | 19 | 32 | 6  | 32 | 32 | 16 | 34 | 23.20 |
| NP_6YVO-D                            | — | — | —  | —  | —  | —  | 33 | 15 | 32 | 34 | 31 | 19 | 27.33 |
| NP_7CDZ-B                            | — | — | —  | —  | —  | —  | 29 | 8  | 34 | 35 | 26 | 20 | 25.33 |
| NP_7CDZ-D                            | — | — | —  | —  | —  | —  | 30 | 14 | 34 | 36 | 23 | 20 | 26.17 |
| NP_7CE0-C                            | — | — | 19 | 16 | 18 | 32 | 36 | 9  | 31 | 31 | 10 | 34 | 23.60 |
| Model3                               |   |   |    |    |    |    |    |    |    |    |    |    |       |
| NP_6WZQ-C                            | — | — | 22 | 16 | 30 | 28 | 23 | 11 | 17 | 16 | 19 | 33 | 21.50 |
| NP_6YUN-A                            | — | — | 21 | 16 | 31 | 30 | 24 | 10 | 18 | 17 | 18 | 32 | 21.70 |

|                               |    |    |    |    |    |    |    |    |    |    |    |    |       |       |
|-------------------------------|----|----|----|----|----|----|----|----|----|----|----|----|-------|-------|
| NP_6YVO-D                     | 6  | 9  | 9  | 15 | 12 | 9  | 3  | 34 | 9  | 8  | 9  | 9  | 11.00 |       |
| NP_7CDZ-B                     | 5  | 8  | 7  | 13 | 10 | 7  | 1  | 27 | 7  | 5  | 7  | 7  | 8.67  |       |
| NP_7CDZ-D                     | 4  | 7  | 8  | 14 | 11 | 8  | 2  | 25 | 8  | 4  | 8  | 8  | 8.92  |       |
| NP_7CE0-C                     | —  | —  | 20 | 16 | 29 | 22 | 13 | 26 | 16 | 18 | 17 | 31 | 20.80 |       |
| Model4                        |    |    |    |    |    |    |    |    |    |    |    |    |       | 18.41 |
| NP_6WZQ-C                     | —  | —  | 29 | 16 | 19 | 25 | 18 | 19 | 21 | 20 | 36 | 26 | 22.90 |       |
| NP_6YUN-A                     | —  | —  | 30 | 16 | 20 | 26 | 20 | 24 | 19 | 19 | 32 | 28 | 23.40 |       |
| NP_6YVO-D                     | 12 | 14 | 15 | 5  | 7  | 13 | 6  | 23 | 14 | 14 | 23 | 17 | 13.58 |       |
| NP_7CDZ-B                     | 10 | 10 | 13 | 6  | 8  | 11 | 4  | 36 | 10 | 13 | 22 | 12 | 12.92 |       |
| NP_7CDZ-D                     | 11 | 12 | 11 | 8  | 9  | 14 | 5  | 32 | 11 | 11 | 25 | 15 | 13.67 |       |
| NP_7CE0-C                     | —  | —  | 28 | 16 | 21 | 27 | 17 | 30 | 20 | 21 | 33 | 27 | 24.00 |       |
| Model5                        |    |    |    |    |    |    |    |    |    |    |    |    |       | 18.79 |
| NP_6WZQ-C                     | —  | —  | 31 | 16 | 33 | 33 | 27 | 17 | 24 | 23 | 14 | 24 | 24.20 |       |
| NP_6YUN-A                     | —  | —  | 33 | 16 | 32 | 29 | 26 | 20 | 22 | 22 | 13 | 22 | 23.50 |       |
| NP_6YVO-D                     | 15 | 14 | 14 | 7  | 13 | 15 | 7  | 21 | 15 | 15 | 26 | 16 | 14.83 |       |
| NP_7CDZ-B                     | 13 | 11 | 12 | 9  | 14 | 10 | 9  | 31 | 13 | 12 | 29 | 13 | 14.67 |       |
| NP_7CDZ-D                     | 14 | 12 | 10 | 10 | 15 | 12 | 8  | 33 | 12 | 10 | 28 | 14 | 14.83 |       |
| NP_7CE0-C                     | —  | —  | 16 | 16 | 16 | 20 | 25 | 29 | 23 | 24 | 15 | 23 | 20.70 |       |
| QHD43423                      |    |    |    |    |    |    |    |    |    |    |    |    |       | 6.36  |
| NP_6WZQ-C                     | 8  | 3  | 4  | 2  | 2  | 3  | 19 | 13 | 1  | 7  | 3  | 3  | 5.67  |       |
| NP_6YUN-A                     | 7  | 1  | 2  | 1  | 1  | 1  | 21 | 16 | 1  | 6  | 1  | 1  | 4.92  |       |
| NP_6YVO-D                     | 2  | 4  | 1  | 4  | 4  | 4  | 11 | 35 | 1  | 1  | 4  | 5  | 6.33  |       |
| NP_7CDZ-B                     | 3  | 6  | 5  | 11 | 5  | 6  | 12 | 21 | 6  | 3  | 6  | 6  | 7.50  |       |
| NP_7CDZ-D                     | 1  | 5  | 3  | 12 | 6  | 5  | 10 | 18 | 5  | 2  | 5  | 4  | 6.33  |       |
| NP_7CE0-C                     | 9  | 2  | 6  | 3  | 3  | 2  | 22 | 28 | 1  | 9  | 2  | 2  | 7.42  |       |
| SARS-CoV-2 Spike Protein (SP) |    |    |    |    |    |    |    |    |    |    |    |    |       |       |
| Model1                        |    |    |    |    |    |    |    |    |    |    |    |    |       | 40.45 |
| SP_6XR8-A                     | 47 | 4  | 64 | 59 | 54 | 25 | 66 | 69 | 1  | 27 | 38 | 52 | 42.17 |       |
| SP_6XR8-B                     | 25 | 24 | 58 | 59 | 68 | 61 | 15 | 19 | 1  | 10 | 33 | 48 | 35.08 |       |
| SP_6XR8-C                     | 22 | 9  | 56 | 59 | 63 | 54 | 15 | 20 | 1  | 9  | 32 | 49 | 32.38 |       |
| SP_7DDD-A                     | 30 | 49 | 66 | 59 | 66 | 67 | 69 | 67 | 1  | 34 | 43 | 57 | 50.63 |       |

|           |    |    |    |    |    |        |    |    |    |    |    |    |       |       |
|-----------|----|----|----|----|----|--------|----|----|----|----|----|----|-------|-------|
| SP_7DDD-B | 31 | 48 | 69 | 59 | 57 | 8      | 46 | 38 | 1  | 60 | 11 | 2  | 35.83 |       |
| SP_7DDD-C | 31 | 51 | 66 | 59 | 66 | 67     | 65 | 66 | 1  | 32 | 34 | 54 | 49.29 |       |
| SP-6ZWV-A | 71 | 46 | 16 | 24 | 23 | 17     | 41 | 49 | 64 | 46 | 70 | 59 | 43.83 |       |
| SP-6ZWV-B | 68 | 39 | 17 | 18 | 24 | 15     | 70 | 59 | 72 | 69 | 72 | 72 | 49.58 |       |
| SP-6ZWV-C | 59 | 52 | 18 | 17 | 20 | 20     | 33 | 35 | 65 | 55 | 7  | 63 | 37.00 |       |
| SP_7JJI-A | 13 | 62 | 57 | 42 | 60 | 60     | 25 | 39 | 55 | 51 | 24 | 50 | 44.79 |       |
| SP_7JJI-B | 37 | 26 | 59 | 59 | 64 | 58     | 12 | 12 | 1  | 5  | 27 | 43 | 33.58 |       |
| SP_7JJI-C | 9  | 28 | 59 | 59 | 64 | 58     | 11 | 10 | 1  | 6  | 27 | 43 | 31.25 |       |
|           |    |    |    |    |    | Model2 |    |    |    |    |    |    |       | 32.16 |
| SP_6XR8-A | 53 | 36 | 31 | 19 | 17 | 27     | 67 | 68 | 1  | 28 | 49 | 9  | 33.75 |       |
| SP_6XR8-B | 31 | 5  | 23 | 25 | 19 | 46     | 24 | 23 | 1  | 11 | 42 | 25 | 22.88 |       |
| SP_6XR8-C | 31 | 11 | 28 | 29 | 31 | 52     | 23 | 23 | 1  | 12 | 38 | 25 | 25.29 |       |
| SP_7DDD-A | 52 | 33 | 41 | 37 | 36 | 43     | 58 | 57 | 1  | 40 | 53 | 37 | 40.67 |       |
| SP_7DDD-B | 49 | 61 | 71 | 59 | 58 | 35     | 47 | 38 | 57 | 65 | 65 | 7  | 50.96 |       |
| SP_7DDD-C | 49 | 41 | 42 | 36 | 37 | 44     | 51 | 56 | 1  | 36 | 53 | 13 | 38.25 |       |
| SP-6ZWV-A | 61 | 45 | 5  | 5  | 6  | 21     | 42 | 44 | 1  | 45 | 3  | 40 | 26.46 |       |
| SP-6ZWV-B | 60 | 2  | 4  | 3  | 4  | 19     | 64 | 52 | 67 | 68 | 6  | 67 | 34.67 |       |
| SP-6ZWV-C | 56 | 44 | 6  | 4  | 5  | 18     | 32 | 33 | 68 | 59 | 35 | 70 | 35.83 |       |
| SP_7JJI-A | 25 | 63 | 25 | 21 | 33 | 47     | 29 | 40 | 1  | 49 | 30 | 36 | 33.25 |       |
| SP_7JJI-B | 44 | 16 | 21 | 30 | 26 | 37     | 5  | 7  | 1  | 8  | 53 | 31 | 23.21 |       |
| SP_7JJI-C | 22 | 16 | 21 | 30 | 26 | 37     | 2  | 3  | 1  | 7  | 53 | 31 | 20.71 |       |
|           |    |    |    |    |    | Model3 |    |    |    |    |    |    |       | 33.40 |
| SP_6XR8-A | 53 | 35 | 29 | 23 | 18 | 26     | 59 | 65 | 1  | 31 | 61 | 12 | 34.38 |       |
| SP_6XR8-B | 37 | 20 | 26 | 26 | 22 | 31     | 18 | 16 | 1  | 21 | 46 | 29 | 24.38 |       |
| SP_6XR8-C | 31 | 11 | 33 | 27 | 28 | 31     | 18 | 16 | 1  | 22 | 45 | 29 | 24.33 |       |
| SP_7DDD-A | 46 | 40 | 44 | 47 | 50 | 39     | 60 | 59 | 1  | 42 | 59 | 33 | 43.33 |       |
| SP_7DDD-B | 43 | 56 | 72 | 59 | 71 | 29     | 48 | 38 | 61 | 64 | 44 | 62 | 53.88 |       |
| SP_7DDD-C | 49 | 43 | 43 | 45 | 50 | 40     | 54 | 58 | 1  | 37 | 59 | 10 | 40.75 |       |
| SP-6ZWV-A | 65 | 50 | 10 | 12 | 10 | 12     | 43 | 43 | 1  | 47 | 16 | 56 | 30.42 |       |
| SP-6ZWV-B | 64 | 2  | 11 | 10 | 10 | 13     | 53 | 46 | 70 | 71 | 18 | 70 | 36.50 |       |
| SP-6ZWV-C | 58 | 60 | 12 | 10 | 10 | 11     | 35 | 33 | 63 | 58 | 10 | 68 | 35.67 |       |

|           |    |    |    |    |    |    |    |    |    |    |    |    |       |       |
|-----------|----|----|----|----|----|----|----|----|----|----|----|----|-------|-------|
| SP_7JJI-A | 7  | 64 | 24 | 20 | 25 | 30 | 30 | 40 | 54 | 54 | 30 | 34 | 34.29 | 36.53 |
| SP_7JJI-B | 44 | 8  | 19 | 35 | 32 | 31 | 5  | 8  | 1  | 23 | 46 | 23 | 22.88 |       |
| SP_7JJI-C | 14 | 9  | 19 | 34 | 30 | 34 | 3  | 4  | 1  | 24 | 46 | 23 | 20.04 |       |
| Model4    |    |    |    |    |    |    |    |    |    |    |    |    |       | 31.34 |
| SP_6XR8-A | 27 | 42 | 45 | 44 | 47 | 48 | 68 | 68 | 1  | 33 | 64 | 11 | 41.46 |       |
| SP_6XR8-B | 1  | 13 | 37 | 55 | 59 | 70 | 21 | 18 | 1  | 16 | 62 | 16 | 30.75 |       |
| SP_6XR8-C | 4  | 13 | 40 | 58 | 61 | 69 | 22 | 20 | 1  | 15 | 62 | 16 | 31.71 |       |
| SP_7DDD-A | 21 | 33 | 47 | 50 | 55 | 50 | 57 | 52 | 1  | 41 | 49 | 25 | 40.08 |       |
| SP_7DDD-B | 19 | 67 | 70 | 59 | 62 | 36 | 39 | 33 | 53 | 66 | 19 | 4  | 43.88 |       |
| SP_7DDD-C | 19 | 38 | 46 | 48 | 56 | 51 | 50 | 55 | 1  | 39 | 49 | 8  | 38.29 |       |
| SP-6ZWV-A | 63 | 47 | 8  | 14 | 14 | 10 | 37 | 39 | 1  | 50 | 8  | 38 | 27.42 |       |
| SP-6ZWV-B | 62 | 1  | 9  | 15 | 15 | 16 | 56 | 46 | 58 | 72 | 9  | 61 | 34.96 |       |
| SP-6ZWV-C | 67 | 32 | 7  | 15 | 15 | 14 | 31 | 32 | 66 | 62 | 14 | 64 | 34.88 |       |
| SP_7JJI-A | 10 | 66 | 51 | 46 | 72 | 71 | 27 | 36 | 56 | 52 | 68 | 18 | 47.71 |       |
| SP_7JJI-B | 40 | 21 | 49 | 59 | 69 | 65 | 8  | 7  | 1  | 17 | 66 | 21 | 35.21 |       |
| SP_7JJI-C | 10 | 21 | 49 | 59 | 69 | 65 | 4  | 3  | 1  | 17 | 66 | 21 | 32.04 |       |
| Model5    |    |    |    |    |    |    |    |    |    |    |    |    |       | 34.90 |
| SP_6XR8-A | 47 | 36 | 36 | 32 | 20 | 28 | 62 | 65 | 1  | 30 | 49 | 5  | 34.25 |       |
| SP_6XR8-B | 15 | 7  | 27 | 33 | 34 | 49 | 17 | 17 | 1  | 14 | 38 | 14 | 22.13 |       |
| SP_6XR8-C | 15 | 5  | 32 | 38 | 39 | 62 | 18 | 18 | 1  | 13 | 38 | 15 | 24.50 |       |
| SP_7DDD-A | 31 | 31 | 39 | 43 | 43 | 42 | 55 | 54 | 1  | 38 | 58 | 35 | 39.17 |       |
| SP_7DDD-B | 37 | 69 | 68 | 59 | 39 | 9  | 44 | 35 | 1  | 63 | 12 | 1  | 36.38 |       |
| SP_7DDD-C | 42 | 30 | 38 | 41 | 43 | 41 | 49 | 55 | 1  | 35 | 53 | 6  | 36.13 |       |
| SP-6ZWV-A | 69 | 55 | 1  | 9  | 7  | 5  | 38 | 40 | 1  | 48 | 2  | 39 | 26.17 |       |
| SP-6ZWV-B | 70 | 68 | 2  | 7  | 7  | 6  | 52 | 45 | 69 | 70 | 14 | 66 | 39.67 |       |
| SP-6ZWV-C | 57 | 57 | 3  | 8  | 9  | 7  | 36 | 35 | 62 | 56 | 5  | 65 | 33.29 |       |
| SP_7JJI-A | 5  | 65 | 30 | 22 | 35 | 45 | 28 | 37 | 52 | 53 | 29 | 25 | 35.50 |       |
| SP_7JJI-B | 41 | 13 | 34 | 39 | 45 | 56 | 5  | 6  | 1  | 19 | 35 | 19 | 26.08 |       |
| SP_7JJI-C | 7  | 16 | 34 | 39 | 45 | 56 | 1  | 2  | 1  | 20 | 35 | 19 | 22.88 |       |
| QHD43416  |    |    |    |    |    |    |    |    |    |    |    |    |       | 34.90 |
| SP_6XR8-A | 22 | 59 | 61 | 54 | 38 | 22 | 63 | 67 | 1  | 25 | 24 | 51 | 40.58 |       |

|           |    |    |    |    |    |    |    |    |    |    |    |    |       |
|-----------|----|----|----|----|----|----|----|----|----|----|----|----|-------|
| SP_6XR8-B | 1  | 23 | 48 | 49 | 48 | 55 | 13 | 16 | 1  | 3  | 22 | 47 | 27.17 |
| SP_6XR8-C | 1  | 25 | 52 | 57 | 49 | 53 | 14 | 17 | 1  | 4  | 23 | 45 | 28.42 |
| SP_7DDD-A | 29 | 54 | 62 | 56 | 42 | 24 | 71 | 67 | 1  | 29 | 13 | 58 | 42.17 |
| SP_7DDD-B | 17 | 71 | 65 | 53 | 29 | 1  | 45 | 37 | 1  | 61 | 4  | 3  | 32.25 |
| SP_7DDD-C | 17 | 53 | 63 | 51 | 41 | 23 | 60 | 63 | 1  | 26 | 26 | 53 | 39.71 |
| SP-6ZWV-A | 72 | 58 | 15 | 6  | 1  | 2  | 40 | 48 | 59 | 44 | 69 | 55 | 39.04 |
| SP-6ZWV-B | 66 | 29 | 14 | 2  | 3  | 4  | 72 | 61 | 71 | 67 | 71 | 69 | 44.08 |
| SP-6ZWV-C | 55 | 70 | 13 | 1  | 1  | 3  | 34 | 35 | 60 | 57 | 1  | 60 | 32.50 |
| SP_7JJI-A | 6  | 72 | 53 | 28 | 53 | 64 | 26 | 40 | 51 | 43 | 17 | 46 | 41.58 |
| SP_7JJI-B | 27 | 16 | 54 | 13 | 13 | 72 | 10 | 11 | 1  | 1  | 20 | 41 | 23.21 |
| SP_7JJI-C | 10 | 26 | 55 | 52 | 52 | 63 | 9  | 8  | 1  | 1  | 20 | 41 | 28.13 |

---

**Table S16.** Validity Assessment of Homology-Based Full-Size 3D Models of SARS-CoV-2 Membrane Protein (MP).

| Model  | QMEAN  | Model           | QMEAN        |
|--------|--------|-----------------|--------------|
| Model1 | -10.78 | Model4          | -16.07       |
| Model2 | -12.58 | Model5          | -11.80       |
| Model3 | -12.65 | <b>QHD43419</b> | <b>-5.79</b> |

**Table S17.** Energetic Characteristics of Protein-Protein Complexes of Human CD46 and SARS-CoV-2 Envelope Protein (EP), Membrane Protein (MP), Nucleocapsid Protein (NP), and Spike Protein (SP).

| Complex<br>CD46 receptor – EP, MP, NP, SP ligands | Program   | $\Delta E$ , kcal/mol | Complex<br>EP, MP, NP, SP receptors – CD46 ligand | Program   | $\Delta E$ , kcal/mol |
|---------------------------------------------------|-----------|-----------------------|---------------------------------------------------|-----------|-----------------------|
| CD46–EP                                           | Cluspro2  | -1218                 | EP–CD46                                           | Cluspro2  | -1217                 |
| CD46–EP                                           | GRAMM1    | 20558                 | EP–CD46                                           | GRAMM1    | 20558                 |
| CD46–EP                                           | Hex8      | -286.5                | EP–CD46                                           | Hex8      | -278.8                |
| CD46–EP                                           | SwarmDock | -179.0                | EP–CD46                                           | SwarmDock | -247.7                |
| CD46–EP                                           | ZDOCK3    | 1815                  | EP–CD46                                           | ZDOCK3    | 1815                  |
| CD46–MP                                           | Cluspro2  | -1300                 | MP–CD46                                           | Cluspro2  | -1355                 |
| CD46–MP                                           | GRAMM1    | 21735                 | MP–CD46                                           | GRAMM1    | 22061                 |
| CD46–MP                                           | Hex8      | -397.2                | MP–CD46                                           | Hex8      | -412.7                |
| CD46–MP                                           | SwarmDock | -252.3                | MP–CD46                                           | SwarmDock | -398.7                |
| CD46–MP                                           | ZDOCK3    | 2186                  | MP–CD46                                           | ZDOCK3    | 2186                  |
| CD46–NP                                           | Cluspro2  | -1354                 | NP–CD46                                           | Cluspro2  | -1473                 |
| CD46–NP                                           | GRAMM1    | 20286                 | NP–CD46                                           | GRAMM1    | 21072                 |
| CD46–NP                                           | Hex8      | -468.3                | NP–CD46                                           | Hex8      | -467.1                |
| CD46–NP                                           | SwarmDock | -193.5                | NP–CD46                                           | SwarmDock | -178.9                |
| CD46–NP                                           | ZDOCK3    | 1834                  | NP–CD46                                           | ZDOCK3    | 1834                  |
| CD46–SP                                           | Cluspro2  | -1329                 | SP–CD46                                           | Cluspro2  | -1329                 |
| CD46–SP                                           | GRAMM1    | 68467                 | SP–CD46                                           | GRAMM1    | 65242                 |
| CD46–SP                                           | Hex8      | -518.3                | SP–CD46                                           | Hex8      | -493.6                |
| CD46–SP                                           | SwarmDock | -294.2                | SP–CD46                                           | SwarmDock | -294.2                |
| CD46–SP                                           | ZDOCK3    | 2219                  | SP–CD46                                           | ZDOCK3    | 2219                  |

Note: In Table S17,  $\Delta E$  is expressed in arbitrary units for the ZDOCK3 program.

The primary energy scoring function for the complexes in different programs is defined as follows:

- Cluspro2 - ELowest: Weighted scoring function of the minimum energy for the given valid complex.
- GRAMM1 - ETotal: Scoring function of the minimum total energy for the given valid complex.
- Hex8 - EInteraction: Scoring function of the minimum energy of protein-protein interaction in the given valid complex.
- SwarmDock - EInteraction: Scoring function of the minimum energy of protein-protein interaction in the most representative cluster of the given valid complex.
- ZDOCK3 - ZDOCKScore: Scoring function of the minimum energy of protein-protein interaction in the given valid complex based on the number of amino acid contacts, expressed in arbitrary units.

**Table S18.** Full Lists of Binding Amino Acids in the Human CD46 and SARS-CoV-2 Envelope Protein (EP) Protein-Protein Complex.

| Human CD46 |          |            | EP SARS-CoV-2 |          |            |
|------------|----------|------------|---------------|----------|------------|
| Amino Acid | Position | Occurrence | Amino Acid    | Position | Occurrence |
| THR        | 188      | 3          | PHE           | 20       | 6          |
| TYR        | 189      | 3          | ILE           | 13       | 5          |
| SER        | 190      | 3          | VAL           | 5        | 4          |
| CYS        | 191      | 3          | THR           | 9        | 4          |
| PRO        | 193      | 3          | LEU           | 12       | 4          |
| PHE        | 200      | 3          | SER           | 16       | 4          |
| LEU        | 202      | 3          | VAL           | 17       | 4          |
| GLU        | 205      | 3          | LEU           | 19       | 4          |
| SER        | 206      | 3          | PHE           | 23       | 4          |
| THR        | 207      | 3          | LEU           | 27       | 4          |
| TYR        | 247      | 3          | VAL           | 29       | 4          |
| PRO        | 3        | 2          | LEU           | 34       | 4          |
| PHE        | 11       | 2          | ARG           | 38       | 4          |
| TRP        | 14       | 2          | ASN           | 45       | 4          |
| PHE        | 16       | 2          | ASN           | 66       | 4          |
| PRO        | 17       | 2          | MET           | 1        | 3          |
| GLY        | 18       | 2          | SER           | 3        | 3          |
| LEU        | 20       | 2          | VAL           | 14       | 3          |
| LEU        | 21       | 2          | LEU           | 18       | 3          |
| MET        | 24       | 2          | VAL           | 25       | 3          |
| LEU        | 27       | 2          | LEU           | 28       | 3          |
| TYR        | 29       | 2          | THR           | 30       | 3          |
| PHE        | 31       | 2          | ALA           | 32       | 3          |
| ASN        | 83       | 2          | THR           | 35       | 3          |
| HIS        | 84       | 2          | LEU           | 39       | 3          |
| THR        | 85       | 2          | TYR           | 42       | 3          |
| PRO        | 88       | 2          | ASN           | 48       | 3          |
| VAL        | 89       | 2          | VAL           | 52       | 3          |
| SER        | 90       | 2          | VAL           | 70       | 3          |
| PRO        | 166      | 2          | LEU           | 73       | 3          |
| ILE        | 168      | 2          | VAL           | 75       | 3          |
| THR        | 174      | 2          | PHE           | 4        | 2          |
| PHE        | 175      | 2          | LEU           | 21       | 2          |
| LEU        | 184      | 2          | ALA           | 22       | 2          |
| ALA        | 186      | 2          | VAL           | 24       | 2          |
| VAL        | 187      | 2          | ILE           | 33       | 2          |
| ALA        | 194      | 2          | ALA           | 36       | 2          |
| PRO        | 197      | 2          | CYS           | 40       | 2          |
| PRO        | 199      | 2          | ALA           | 41       | 2          |
| TYR        | 209      | 2          | CYS           | 43       | 2          |
| TRP        | 216      | 2          | CYS           | 44       | 2          |
| ALA        | 219      | 2          | ILE           | 46       | 2          |
| ALA        | 220      | 2          | PRO           | 54       | 2          |
| GLU        | 222      | 2          | TYR           | 59       | 2          |
| ILE        | 239      | 2          | ARG           | 61       | 2          |

|     |     |   |     |    |   |
|-----|-----|---|-----|----|---|
| PHE | 242 | 2 | VAL | 62 | 2 |
| GLY | 243 | 2 | TYR | 2  | 1 |
| LYS | 244 | 2 | SER | 6  | 1 |
| LYS | 245 | 2 | GLU | 8  | 1 |
| TYR | 248 | 2 | THR | 11 | 1 |
| SER | 341 | 2 | ASN | 15 | 1 |
| VAL | 351 | 2 | PHE | 26 | 1 |
| ALA | 353 | 2 | LEU | 31 | 1 |
| LYS | 169 | 1 | LEU | 37 | 1 |
| ASP | 192 | 1 | VAL | 47 | 1 |
| ILE | 203 | 1 | VAL | 49 | 1 |
| PRO | 221 | 1 | SER | 55 | 1 |
| LYS | 237 | 1 | PHE | 56 | 1 |
| GLN | 238 | 1 | SER | 67 | 1 |
| SER | 240 | 1 | PRO | 71 | 1 |
| GLY | 241 | 1 | ASP | 72 | 1 |
| LYS | 249 | 1 | LEU | 74 | 1 |
| THR | 251 | 1 |     |    |   |
| MET | 253 | 1 |     |    |   |
| GLU | 255 | 1 |     |    |   |
| TYR | 261 | 1 |     |    |   |
| LEU | 262 | 1 |     |    |   |
| ASP | 263 | 1 |     |    |   |
| GLY | 264 | 1 |     |    |   |
| SER | 265 | 1 |     |    |   |
| ASP | 266 | 1 |     |    |   |
| THR | 267 | 1 |     |    |   |
| VAL | 269 | 1 |     |    |   |
| ASP | 271 | 1 |     |    |   |
| ASP | 277 | 1 |     |    |   |
| PRO | 278 | 1 |     |    |   |
| PRO | 279 | 1 |     |    |   |
| PRO | 281 | 1 |     |    |   |
| THR | 292 | 1 |     |    |   |
| LYS | 293 | 1 |     |    |   |
| PRO | 295 | 1 |     |    |   |
| LEU | 297 | 1 |     |    |   |
| HIS | 299 | 1 |     |    |   |
| SER | 300 | 1 |     |    |   |
| THR | 307 | 1 |     |    |   |
| SER | 309 | 1 |     |    |   |
| PRO | 310 | 1 |     |    |   |
| ALA | 314 | 1 |     |    |   |
| GLY | 316 | 1 |     |    |   |
| PRO | 317 | 1 |     |    |   |
| PRO | 323 | 1 |     |    |   |
| SER | 326 | 1 |     |    |   |
| ASN | 327 | 1 |     |    |   |
| GLY | 337 | 1 |     |    |   |
| ILE | 338 | 1 |     |    |   |



|     |     |   |
|-----|-----|---|
| LEU | 339 | 1 |
| LEU | 342 | 1 |
| TRP | 345 | 1 |
| ILE | 352 | 1 |
| ILE | 354 | 1 |
| VAL | 355 | 1 |
| VAL | 358 | 1 |
| ALA | 359 | 1 |
| VAL | 360 | 1 |
| CYS | 362 | 1 |
| THR | 383 | 1 |
| ARG | 385 | 1 |
| VAL | 387 | 1 |

Note: Binding amino acids with the highest occurrence are highlighted in bold.

**Table S19.** Full Lists of Binding Amino Acids in the Human CD46 and SARS-CoV-2 Membrane Protein (MP) Protein-Protein Complex.

| Human CD46 |            |            | MP SARS-CoV-2 |           |            |
|------------|------------|------------|---------------|-----------|------------|
| Amino Acid | Position   | Occurrence | Amino Acid    | Position  | Occurrence |
| <b>PHE</b> | <b>11</b>  | <b>4</b>   | <b>VAL</b>    | <b>60</b> | <b>7</b>   |
| <b>PRO</b> | <b>12</b>  | <b>4</b>   | <b>PRO</b>    | <b>59</b> | <b>6</b>   |
| <b>TRP</b> | <b>14</b>  | <b>4</b>   | <b>ALA</b>    | <b>63</b> | <b>6</b>   |
| <b>PHE</b> | <b>16</b>  | <b>4</b>   | <b>VAL</b>    | <b>66</b> | <b>6</b>   |
| <b>PRO</b> | <b>17</b>  | <b>4</b>   | <b>VAL</b>    | <b>70</b> | <b>6</b>   |
| <b>LEU</b> | <b>20</b>  | <b>4</b>   | <b>ASP</b>    | <b>3</b>  | <b>5</b>   |
| <b>MET</b> | <b>24</b>  | <b>4</b>   | <b>LEU</b>    | <b>56</b> | <b>5</b>   |
| <b>VAL</b> | <b>25</b>  | <b>4</b>   | <b>LEU</b>    | <b>67</b> | <b>5</b>   |
| <b>LEU</b> | <b>26</b>  | <b>4</b>   | <b>PHE</b>    | <b>96</b> | <b>5</b>   |
| <b>LEU</b> | <b>27</b>  | <b>4</b>   | <b>MET</b>    | <b>1</b>  | <b>4</b>   |
| <b>TYR</b> | <b>29</b>  | <b>4</b>   | <b>LEU</b>    | <b>13</b> | <b>4</b>   |
| <b>PHE</b> | <b>31</b>  | <b>4</b>   | <b>TRP</b>    | <b>20</b> | <b>4</b>   |
| <b>GLU</b> | <b>36</b>  | <b>4</b>   | <b>LEU</b>    | <b>57</b> | <b>4</b>   |
| <b>ASN</b> | <b>83</b>  | <b>4</b>   | <b>LEU</b>    | <b>62</b> | <b>4</b>   |
| <b>THR</b> | <b>85</b>  | <b>4</b>   | <b>TYR</b>    | <b>71</b> | <b>4</b>   |
| <b>ILE</b> | <b>239</b> | <b>4</b>   | <b>ILE</b>    | <b>82</b> | <b>4</b>   |
| <b>TYR</b> | <b>247</b> | <b>4</b>   | <b>LEU</b>    | <b>90</b> | <b>4</b>   |
| <b>THR</b> | <b>251</b> | <b>4</b>   | <b>TRP</b>    | <b>92</b> | <b>4</b>   |
| <b>VAL</b> | <b>269</b> | <b>4</b>   | LEU           | 17        | 3          |
| SER        | 30         | 3          | ILE           | 24        | 3          |
| HIS        | 84         | 3          | GLN           | 36        | 3          |
| LYS        | 237        | 3          | TYR           | 39        | 3          |
| SER        | 240        | 3          | PHE           | 45        | 3          |
| GLY        | 241        | 3          | ILE           | 49        | 3          |
| PHE        | 242        | 3          | TRP           | 55        | 3          |
| LYS        | 249        | 3          | CYS           | 64        | 3          |
| MET        | 253        | 3          | ALA           | 69        | 3          |
| SER        | 265        | 3          | ARG           | 72        | 3          |
| ASP        | 266        | 3          | MET           | 91        | 3          |

|     |     |   |     |     |   |
|-----|-----|---|-----|-----|---|
| THR | 267 | 3 | SER | 94  | 3 |
| LEU | 342 | 3 | TYR | 95  | 3 |
| VAL | 351 | 3 | MET | 109 | 3 |
| VAL | 355 | 3 | PHE | 112 | 3 |
| PRO | 3   | 2 | LEU | 134 | 3 |
| SER | 13  | 2 | GLU | 135 | 3 |
| ARG | 15  | 2 | ALA | 2   | 2 |
| LEU | 21  | 2 | SER | 4   | 2 |
| LEU | 28  | 2 | THR | 7   | 2 |
| SER | 32  | 2 | ILE | 8   | 2 |
| ASP | 33  | 2 | VAL | 10  | 2 |
| ALA | 34  | 2 | LEU | 16  | 2 |
| LEU | 184 | 2 | TRP | 31  | 2 |
| ALA | 186 | 2 | ILE | 32  | 2 |
| THR | 188 | 2 | PHE | 37  | 2 |
| SER | 190 | 2 | ALA | 40  | 2 |
| LEU | 202 | 2 | ASN | 43  | 2 |
| GLU | 205 | 2 | ARG | 44  | 2 |
| SER | 206 | 2 | ILE | 52  | 2 |
| THR | 207 | 2 | PHE | 53  | 2 |
| GLU | 255 | 2 | TRP | 58  | 2 |
| ASP | 257 | 2 | PHE | 65  | 2 |
| LYS | 258 | 2 | TRP | 75  | 2 |
| TYR | 261 | 2 | CYS | 86  | 2 |
| GLY | 264 | 2 | LEU | 93  | 2 |
| ALA | 314 | 2 | ILE | 97  | 2 |
| PRO | 323 | 2 | PHE | 100 | 2 |
| LEU | 339 | 2 | PHE | 103 | 2 |
| ASP | 340 | 2 | ARG | 107 | 2 |
| SER | 341 | 2 | GLU | 115 | 2 |
| VAL | 344 | 2 | ASN | 117 | 2 |
| TRP | 345 | 2 | HIS | 125 | 2 |
| ILE | 347 | 2 | ASP | 163 | 2 |
| ALA | 348 | 2 | PRO | 165 | 2 |
| ALA | 353 | 2 | GLU | 167 | 2 |
| VAL | 360 | 2 | ARG | 174 | 2 |
| HIS | 384 | 2 | TYR | 178 | 2 |
| PRO | 4   | 1 | GLU | 12  | 1 |
| ARG | 6   | 1 | LEU | 27  | 1 |
| CYS | 9   | 1 | CYS | 33  | 1 |
| PRO | 52  | 1 | LEU | 35  | 1 |
| ASP | 104 | 1 | ILE | 48  | 1 |
| ASN | 107 | 1 | LYS | 50  | 1 |
| ASN | 128 | 1 | LEU | 54  | 1 |
| GLU | 129 | 1 | THR | 61  | 1 |
| TYR | 132 | 1 | ILE | 73  | 1 |
| THR | 163 | 1 | ASN | 74  | 1 |
| LYS | 172 | 1 | GLY | 78  | 1 |
| PHE | 175 | 1 | LEU | 87  | 1 |
| TYR | 183 | 1 | ARG | 101 | 1 |

|     |     |   |     |     |   |
|-----|-----|---|-----|-----|---|
| ASP | 185 | 1 | ARG | 105 | 1 |
| TYR | 189 | 1 | PRO | 123 | 1 |
| CYS | 191 | 1 | GLY | 126 | 1 |
| ASP | 192 | 1 | ILE | 128 | 1 |
| PRO | 193 | 1 | GLY | 141 | 1 |
| ALA | 194 | 1 | VAL | 143 | 1 |
| PRO | 199 | 1 | ARG | 150 | 1 |
| ILE | 203 | 1 | ILE | 151 | 1 |
| VAL | 215 | 1 | ALA | 152 | 1 |
| ALA | 219 | 1 | GLY | 153 | 1 |
| ALA | 220 | 1 | ARG | 158 | 1 |
| GLU | 222 | 1 | LYS | 162 | 1 |
| LYS | 224 | 1 | SER | 173 | 1 |
| GLY | 243 | 1 | LEU | 176 | 1 |
| LYS | 244 | 1 | GLN | 185 | 1 |
| TYR | 248 | 1 | PHE | 193 | 1 |
| ALA | 250 | 1 | ILE | 201 | 1 |
| LEU | 262 | 1 | GLY | 202 | 1 |
| ASP | 263 | 1 | ASN | 203 | 1 |
| SER | 272 | 1 | TYR | 204 | 1 |
| PRO | 278 | 1 | LYS | 205 | 1 |
| HIS | 299 | 1 | GLN | 222 | 1 |
| SER | 315 | 1 |     |     |   |
| GLY | 316 | 1 |     |     |   |
| PRO | 317 | 1 |     |     |   |
| THR | 320 | 1 |     |     |   |
| LYS | 322 | 1 |     |     |   |
| SER | 326 | 1 |     |     |   |
| ASP | 343 | 1 |     |     |   |
| GLY | 357 | 1 |     |     |   |

Note: Binding amino acids with the highest occurrence are highlighted in bold.

**Table S20.** Full Lists of Binding Amino Acids in the Human CD46 and SARS-CoV-2 Nucleocapsid Protein (NP) Protein-Protein Complex.

| Human CD46 |          |            | NP SARS-CoV-2 |          |            |
|------------|----------|------------|---------------|----------|------------|
| Amino Acid | Position | Occurrence | Amino Acid    | Position | Occurrence |
| ASP        | 343      | 5          | PHE           | 17       | 4          |
| VAL        | 344      | 5          | SER           | 21       | 4          |
| TRP        | 345      | 5          | SER           | 79       | 4          |
| TYR        | 247      | 4          | HIS           | 145      | 4          |
| SER        | 341      | 4          | GLY           | 212      | 4          |
| LEU        | 342      | 4          | ASP           | 216      | 4          |
| VAL        | 346      | 4          | THR           | 334      | 4          |
| VAL        | 351      | 4          | GLY           | 335      | 4          |
| TYR        | 132      | 3          | ALA           | 336      | 4          |
| ALA        | 194      | 3          | ASP           | 81       | 3          |
| PRO        | 199      | 3          | ASP           | 82       | 3          |
| GLU        | 205      | 3          | ASN           | 140      | 3          |

|     |     |   |     |     |   |
|-----|-----|---|-----|-----|---|
| TRP | 216 | 3 | THR | 141 | 3 |
| ARG | 218 | 3 | ALA | 211 | 3 |
| PHE | 242 | 3 | ASN | 213 | 3 |
| LYS | 245 | 3 | LEU | 219 | 3 |
| ILE | 338 | 3 | LEU | 223 | 3 |
| LEU | 339 | 3 | ARG | 259 | 3 |
| ASP | 340 | 3 | ARG | 277 | 3 |
| ILE | 347 | 3 | PRO | 279 | 3 |
| ALA | 353 | 3 | GLN | 281 | 3 |
| ILE | 354 | 3 | THR | 282 | 3 |
| VAL | 355 | 3 | GLN | 283 | 3 |
| ALA | 359 | 3 | GLY | 284 | 3 |
| VAL | 360 | 3 | ASN | 285 | 3 |
| TYR | 366 | 3 | PHE | 286 | 3 |
| TYR | 368 | 3 | ILE | 304 | 3 |
| TYR | 378 | 3 | PRO | 309 | 3 |
| THR | 380 | 3 | PHE | 314 | 3 |
| THR | 383 | 3 | TYR | 333 | 3 |
| HIS | 384 | 3 | ILE | 337 | 3 |
| MET | 1   | 2 | GLN | 7   | 2 |
| GLU | 2   | 2 | GLN | 9   | 2 |
| PRO | 3   | 2 | ARG | 14  | 2 |
| GLY | 5   | 2 | ILE | 15  | 2 |
| ARG | 6   | 2 | THR | 16  | 2 |
| ARG | 7   | 2 | ASN | 77  | 2 |
| GLU | 8   | 2 | SER | 78  | 2 |
| CYS | 9   | 2 | ARG | 92  | 2 |
| PHE | 11  | 2 | ILE | 94  | 2 |
| TRP | 14  | 2 | ARG | 95  | 2 |
| ARG | 15  | 2 | LEU | 104 | 2 |
| PHE | 16  | 2 | ARG | 107 | 2 |
| PRO | 17  | 2 | LEU | 139 | 2 |
| LEU | 19  | 2 | VAL | 158 | 2 |
| LEU | 20  | 2 | ARG | 177 | 2 |
| LEU | 21  | 2 | GLN | 181 | 2 |
| ALA | 22  | 2 | ARG | 195 | 2 |
| ALA | 23  | 2 | THR | 198 | 2 |
| MET | 24  | 2 | SER | 201 | 2 |
| VAL | 25  | 2 | PRO | 207 | 2 |
| LEU | 27  | 2 | ALA | 208 | 2 |
| TYR | 29  | 2 | ARG | 226 | 2 |
| LEU | 133 | 2 | LEU | 227 | 2 |
| GLY | 135 | 2 | LEU | 230 | 2 |
| GLU | 137 | 2 | GLU | 231 | 2 |
| THR | 163 | 2 | GLN | 239 | 2 |
| SER | 190 | 2 | GLN | 241 | 2 |
| ASP | 192 | 2 | GLN | 244 | 2 |
| PRO | 193 | 2 | THR | 245 | 2 |
| GLY | 196 | 2 | VAL | 246 | 2 |
| PHE | 200 | 2 | GLN | 260 | 2 |

|     |     |   |     |     |   |
|-----|-----|---|-----|-----|---|
| ILE | 203 | 2 | ARG | 262 | 2 |
| TYR | 209 | 2 | PHE | 274 | 2 |
| ASN | 213 | 2 | GLU | 280 | 2 |
| VAL | 215 | 2 | THR | 296 | 2 |
| SER | 217 | 2 | TRP | 301 | 2 |
| ALA | 219 | 2 | ALA | 305 | 2 |
| GLY | 243 | 2 | PHE | 307 | 2 |
| TYR | 248 | 2 | ALA | 308 | 2 |
| LYS | 249 | 2 | MET | 317 | 2 |
| THR | 251 | 2 | SER | 318 | 2 |
| ALA | 314 | 2 | ARG | 319 | 2 |
| PRO | 317 | 2 | GLU | 323 | 2 |
| SER | 326 | 2 | SER | 327 | 2 |
| CYS | 362 | 2 | TRP | 330 | 2 |
| PRO | 365 | 2 | LEU | 331 | 2 |
| ARG | 367 | 2 | LEU | 339 | 2 |
| GLN | 370 | 2 | LEU | 353 | 2 |
| ARG | 372 | 2 | ILE | 357 | 2 |
| LYS | 374 | 2 | THR | 393 | 2 |
| LEU | 379 | 2 | LEU | 394 | 2 |
| ASP | 381 | 2 | LEU | 395 | 2 |
| GLU | 382 | 2 | LEU | 400 | 2 |
| ARG | 385 | 2 | PHE | 403 | 2 |
| GLU | 386 | 2 | SER | 404 | 2 |
| VAL | 387 | 2 | LEU | 407 | 2 |
| PRO | 4   | 1 | MET | 411 | 2 |
| PRO | 10  | 1 | ASN | 11  | 1 |
| PRO | 12  | 1 | SER | 23  | 1 |
| GLY | 18  | 1 | ASN | 29  | 1 |
| LEU | 26  | 1 | GLY | 30  | 1 |
| TYR | 101 | 1 | ARG | 32  | 1 |
| GLN | 109 | 1 | SER | 33  | 1 |
| ALA | 110 | 1 | GLY | 34  | 1 |
| VAL | 111 | 1 | ARG | 36  | 1 |
| PRO | 112 | 1 | SER | 37  | 1 |
| TYR | 117 | 1 | LYS | 38  | 1 |
| HIS | 124 | 1 | ARG | 40  | 1 |
| ILE | 126 | 1 | ARG | 41  | 1 |
| CYS | 127 | 1 | LYS | 61  | 1 |
| ILE | 134 | 1 | ASP | 63  | 1 |
| LEU | 161 | 1 | LYS | 65  | 1 |
| PRO | 166 | 1 | THR | 76  | 1 |
| ILE | 168 | 1 | PRO | 80  | 1 |
| THR | 174 | 1 | ILE | 84  | 1 |
| PHE | 175 | 1 | ARG | 93  | 1 |
| THR | 188 | 1 | LYS | 100 | 1 |
| CYS | 191 | 1 | GLY | 114 | 1 |
| PRO | 197 | 1 | ALA | 119 | 1 |
| SER | 201 | 1 | GLY | 120 | 1 |
| LEU | 202 | 1 | TYR | 123 | 1 |

|     |     |   |     |     |   |
|-----|-----|---|-----|-----|---|
| GLY | 204 | 1 | GLY | 124 | 1 |
| GLY | 211 | 1 | ALA | 125 | 1 |
| SER | 214 | 1 | ASN | 126 | 1 |
| ALA | 220 | 1 | LYS | 127 | 1 |
| GLU | 222 | 1 | ASP | 128 | 1 |
| GLN | 238 | 1 | ILE | 130 | 1 |
| SER | 240 | 1 | ILE | 131 | 1 |
| GLY | 241 | 1 | GLU | 136 | 1 |
| PHE | 246 | 1 | GLY | 137 | 1 |
| ALA | 250 | 1 | ALA | 138 | 1 |
| MET | 253 | 1 | PRO | 142 | 1 |
| GLU | 255 | 1 | LYS | 143 | 1 |
| TYR | 261 | 1 | ASP | 144 | 1 |
| ASP | 266 | 1 | ALA | 173 | 1 |
| THR | 267 | 1 | ARG | 191 | 1 |
| ASP | 271 | 1 | ASN | 192 | 1 |
| SER | 272 | 1 | SER | 193 | 1 |
| ASN | 273 | 1 | SER | 194 | 1 |
| THR | 275 | 1 | ASN | 196 | 1 |
| TRP | 276 | 1 | SER | 197 | 1 |
| ASP | 277 | 1 | SER | 206 | 1 |
| PRO | 279 | 1 | ARG | 209 | 1 |
| PRO | 310 | 1 | MET | 210 | 1 |
| SER | 313 | 1 | ALA | 217 | 1 |
| SER | 315 | 1 | ALA | 220 | 1 |
| GLY | 316 | 1 | PRO | 258 | 1 |
| TYR | 321 | 1 | LYS | 261 | 1 |
| LYS | 322 | 1 | THR | 263 | 1 |
| ASN | 327 | 1 | ALA | 264 | 1 |
| TYR | 328 | 1 | VAL | 270 | 1 |
| TYR | 331 | 1 | ALA | 273 | 1 |
| GLY | 357 | 1 | GLY | 278 | 1 |
| VAL | 358 | 1 | LEU | 291 | 1 |
|     |     |   | GLN | 306 | 1 |
|     |     |   | LYS | 338 | 1 |
|     |     |   | ASP | 341 | 1 |
|     |     |   | LYS | 342 | 1 |
|     |     |   | PRO | 344 | 1 |
|     |     |   | ASN | 345 | 1 |
|     |     |   | LYS | 347 | 1 |
|     |     |   | ASN | 354 | 1 |
|     |     |   | ASP | 358 | 1 |
|     |     |   | LYS | 361 | 1 |
|     |     |   | LYS | 388 | 1 |
|     |     |   | GLN | 390 | 1 |
|     |     |   | VAL | 392 | 1 |
|     |     |   | GLN | 409 | 1 |
|     |     |   | SER | 410 | 1 |
|     |     |   | ASP | 415 | 1 |
|     |     |   | SER | 416 | 1 |

|     |     |   |
|-----|-----|---|
| GLN | 418 | 1 |
| ALA | 419 | 1 |

Note: Binding amino acids with the highest occurrence are highlighted in bold.

**Table S21.** Full Lists of Binding Amino Acids in the Human CD46 and SARS-CoV-2 Spike Protein (SP) Protein-Protein Complex.

| Human CD46 |          |            | SP SARS-CoV-2 |          |            |
|------------|----------|------------|---------------|----------|------------|
| Amino Acid | Position | Occurrence | Amino Acid    | Position | Occurrence |
| ARG        | 218      | 5          | VAL           | 3        | 5          |
| GLN        | 122      | 4          | LEU           | 5        | 5          |
| GLU        | 177      | 4          | MET           | 1        | 4          |
| ALA        | 219      | 4          | PHE           | 2        | 4          |
| LYS        | 249      | 4          | PHE           | 4        | 3          |
| TYR        | 131      | 3          | VAL           | 6        | 3          |
| VAL        | 178      | 3          | ASP           | 198      | 3          |
| PRO        | 199      | 3          | GLY           | 199      | 3          |
| GLU        | 205      | 3          | GLN           | 271      | 3          |
| VAL        | 215      | 3          | SER           | 375      | 3          |
| TRP        | 216      | 3          | ASP           | 405      | 3          |
| SER        | 217      | 3          | ARG           | 408      | 3          |
| SER        | 240      | 3          | GLY           | 502      | 3          |
| PHE        | 242      | 3          | VAL           | 503      | 3          |
| LYS        | 244      | 3          | LEU           | 1145     | 3          |
| TYR        | 248      | 3          | ASP           | 1146     | 3          |
| LYS        | 293      | 3          | ASN           | 61       | 2          |
| PRO        | 295      | 3          | PRO           | 85       | 2          |
| LEU        | 342      | 3          | ASN           | 87       | 2          |
| TRP        | 345      | 3          | LYS           | 113      | 2          |
| ILE        | 347      | 3          | THR           | 114      | 2          |
| VAL        | 351      | 3          | GLN           | 115      | 2          |
| ALA        | 353      | 3          | GLU           | 132      | 2          |
| VAL        | 355      | 3          | ASN           | 165      | 2          |
| GLY        | 357      | 3          | THR           | 167      | 2          |
| ALA        | 359      | 3          | TYR           | 200      | 2          |
| VAL        | 360      | 3          | GLN           | 321      | 2          |
| PHE        | 389      | 3          | GLY           | 404      | 2          |
| THR        | 40       | 2          | THR           | 415      | 2          |
| ILE        | 71       | 2          | GLY           | 416      | 2          |
| PRO        | 72       | 2          | LYS           | 417      | 2          |
| PRO        | 73       | 2          | ASP           | 420      | 2          |
| LEU        | 74       | 2          | LEU           | 455      | 2          |
| ALA        | 75       | 2          | PHE           | 456      | 2          |
| PRO        | 88       | 2          | TYR           | 473      | 2          |
| SER        | 90       | 2          | GLN           | 474      | 2          |
| ASP        | 92       | 2          | ALA           | 475      | 2          |
| TYR        | 95       | 2          | GLY           | 485      | 2          |
| LEU        | 106      | 2          | PHE           | 486      | 2          |
| TYR        | 117      | 2          | ASN           | 487      | 2          |
| HIS        | 124      | 2          | TYR           | 489      | 2          |
| ILE        | 126      | 2          | GLN           | 493      | 2          |

|     |     |   |     |      |   |
|-----|-----|---|-----|------|---|
| CYS | 127 | 2 | THR | 500  | 2 |
| GLU | 129 | 2 | ASN | 501  | 2 |
| LEU | 133 | 2 | GLY | 504  | 2 |
| GLU | 136 | 2 | ARG | 634  | 2 |
| GLU | 137 | 2 | TYR | 674  | 2 |
| ILE | 138 | 2 | GLU | 725  | 2 |
| THR | 163 | 2 | GLN | 762  | 2 |
| PRO | 166 | 2 | ARG | 765  | 2 |
| ILE | 168 | 2 | PHE | 970  | 2 |
| LYS | 169 | 2 | GLY | 971  | 2 |
| THR | 174 | 2 | ILE | 973  | 2 |
| PHE | 175 | 2 | GLU | 988  | 2 |
| GLU | 179 | 2 | GLN | 992  | 2 |
| TYR | 183 | 2 | ARG | 995  | 2 |
| ASP | 185 | 2 | GLN | 1002 | 2 |
| THR | 188 | 2 | GLU | 1017 | 2 |
| TYR | 189 | 2 | ALA | 1020 | 2 |
| SER | 190 | 2 | LEU | 1024 | 2 |
| LEU | 202 | 2 | ASP | 1041 | 2 |
| GLY | 204 | 2 | LYS | 1149 | 2 |
| SER | 206 | 2 | GLU | 1150 | 2 |
| TYR | 209 | 2 | ASP | 1153 | 2 |
| ASP | 212 | 2 | PHE | 1156 | 2 |
| ASN | 213 | 2 | SER | 1161 | 2 |
| ALA | 220 | 2 | ASN | 1178 | 2 |
| GLU | 222 | 2 | ILE | 1183 | 2 |
| GLN | 238 | 2 | LEU | 1186 | 2 |
| ILE | 239 | 2 | TRP | 1214 | 2 |
| TYR | 247 | 2 | ILE | 1216 | 2 |
| MET | 253 | 2 | TRP | 1217 | 2 |
| ASP | 266 | 2 | LEU | 1218 | 2 |
| THR | 267 | 2 | PHE | 1220 | 2 |
| SER | 290 | 2 | ILE | 1225 | 2 |
| SER | 291 | 2 | MET | 1233 | 2 |
| THR | 292 | 2 | LEU | 1234 | 2 |
| PRO | 294 | 2 | CYS | 1236 | 2 |
| SER | 305 | 2 | CYS | 1250 | 2 |
| THR | 306 | 2 | VAL | 1268 | 2 |
| THR | 307 | 2 | LYS | 1269 | 2 |
| SER | 309 | 2 | HIS | 1271 | 2 |
| SER | 313 | 2 | LEU | 7    | 1 |
| SER | 315 | 2 | LEU | 8    | 1 |
| TYR | 321 | 2 | PRO | 9    | 1 |
| ASN | 327 | 2 | LEU | 10   | 1 |
| TYR | 328 | 2 | SER | 12   | 1 |
| PRO | 329 | 2 | GLN | 14   | 1 |
| TYR | 331 | 2 | ARG | 21   | 1 |
| LYS | 333 | 2 | GLN | 23   | 1 |
| VAL | 344 | 2 | LEU | 24   | 1 |
| VAL | 358 | 2 | PRO | 26   | 1 |



|     |     |   |     |     |   |
|-----|-----|---|-----|-----|---|
| CYS | 362 | 2 | TYR | 28  | 1 |
| ARG | 367 | 2 | ASN | 30  | 1 |
| LYS | 375 | 2 | PHE | 59  | 1 |
| THR | 383 | 2 | ASP | 80  | 1 |
| LYS | 388 | 2 | ASN | 81  | 1 |
| SER | 391 | 2 | PRO | 82  | 1 |
| LEU | 392 | 2 | VAL | 83  | 1 |
| ARG | 6   | 1 | LEU | 84  | 1 |
| ARG | 7   | 1 | PHE | 86  | 1 |
| GLU | 8   | 1 | ASP | 88  | 1 |
| CYS | 9   | 1 | THR | 108 | 1 |
| PHE | 11  | 1 | ASN | 196 | 1 |
| TRP | 14  | 1 | ILE | 197 | 1 |
| LEU | 20  | 1 | ASN | 234 | 1 |
| MET | 24  | 1 | VAL | 267 | 1 |
| VAL | 25  | 1 | GLY | 268 | 1 |
| LEU | 28  | 1 | TYR | 269 | 1 |
| TYR | 29  | 1 | PRO | 272 | 1 |
| SER | 30  | 1 | GLU | 309 | 1 |
| GLU | 36  | 1 | LYS | 310 | 1 |
| GLU | 37  | 1 | GLY | 311 | 1 |
| PRO | 38  | 1 | ILE | 312 | 1 |
| LYS | 66  | 1 | ASN | 317 | 1 |
| THR | 85  | 1 | ARG | 319 | 1 |
| TRP | 86  | 1 | PRO | 322 | 1 |
| LEU | 87  | 1 | THR | 323 | 1 |
| THR | 98  | 1 | GLU | 324 | 1 |
| ASN | 107 | 1 | LEU | 335 | 1 |
| VAL | 111 | 1 | CYS | 336 | 1 |
| ALA | 113 | 1 | PRO | 337 | 1 |
| MET | 123 | 1 | GLY | 339 | 1 |
| PHE | 125 | 1 | GLU | 340 | 1 |
| ASN | 128 | 1 | ASN | 343 | 1 |
| TYR | 132 | 1 | ASP | 364 | 1 |
| LEU | 139 | 1 | VAL | 367 | 1 |
| TYR | 140 | 1 | TYR | 369 | 1 |
| GLU | 142 | 1 | SER | 373 | 1 |
| SER | 151 | 1 | PHE | 374 | 1 |
| CYS | 157 | 1 | THR | 376 | 1 |
| GLU | 158 | 1 | PHE | 377 | 1 |
| LYS | 159 | 1 | GLY | 381 | 1 |
| LEU | 161 | 1 | VAL | 382 | 1 |
| LYS | 167 | 1 | SER | 383 | 1 |
| ASN | 170 | 1 | PRO | 384 | 1 |
| VAL | 180 | 1 | THR | 385 | 1 |
| GLU | 182 | 1 | VAL | 407 | 1 |
| LEU | 184 | 1 | ASN | 437 | 1 |
| ASP | 192 | 1 | GLN | 506 | 1 |
| ALA | 194 | 1 | PRO | 527 | 1 |
| ASP | 198 | 1 | LYS | 529 | 1 |

|     |     |   |     |     |   |
|-----|-----|---|-----|-----|---|
| PHE | 200 | 1 | ASN | 556 | 1 |
| ILE | 203 | 1 | LYS | 557 | 1 |
| SER | 214 | 1 | ILE | 569 | 1 |
| PRO | 221 | 1 | PHE | 592 | 1 |
| CYS | 223 | 1 | THR | 604 | 1 |
| VAL | 225 | 1 | SER | 605 | 1 |
| LYS | 227 | 1 | ASN | 606 | 1 |
| CYS | 228 | 1 | ASP | 614 | 1 |
| ARG | 229 | 1 | VAL | 615 | 1 |
| PHE | 230 | 1 | ASN | 616 | 1 |
| VAL | 232 | 1 | THR | 618 | 1 |
| LYS | 237 | 1 | HIS | 625 | 1 |
| GLY | 243 | 1 | ALA | 626 | 1 |
| LYS | 245 | 1 | ASP | 627 | 1 |
| THR | 251 | 1 | GLN | 628 | 1 |
| ASP | 257 | 1 | THR | 632 | 1 |
| LYS | 258 | 1 | VAL | 635 | 1 |
| LEU | 262 | 1 | SER | 637 | 1 |
| ASP | 263 | 1 | THR | 638 | 1 |
| SER | 265 | 1 | GLY | 639 | 1 |
| VAL | 269 | 1 | SER | 640 | 1 |
| ASP | 271 | 1 | PHE | 643 | 1 |
| SER | 272 | 1 | GLN | 644 | 1 |
| ASN | 273 | 1 | ARG | 646 | 1 |
| ASP | 277 | 1 | HIS | 655 | 1 |
| PRO | 278 | 1 | VAL | 656 | 1 |
| PRO | 279 | 1 | GLU | 661 | 1 |
| LYS | 282 | 1 | CYS | 662 | 1 |
| LEU | 297 | 1 | ASP | 663 | 1 |
| HIS | 299 | 1 | PRO | 665 | 1 |
| ARG | 318 | 1 | GLY | 667 | 1 |
| LEU | 339 | 1 | ALA | 668 | 1 |
| SER | 341 | 1 | GLY | 669 | 1 |
| ASP | 343 | 1 | SER | 673 | 1 |
| ALA | 348 | 1 | GLN | 675 | 1 |
| VAL | 349 | 1 | GLN | 677 | 1 |
| ILE | 350 | 1 | THR | 678 | 1 |
| ILE | 352 | 1 | ILE | 693 | 1 |
| ILE | 354 | 1 | MET | 697 | 1 |
| VAL | 356 | 1 | LEU | 699 | 1 |
| ILE | 361 | 1 | GLY | 700 | 1 |
| PRO | 365 | 1 | THR | 724 | 1 |
| THR | 377 | 1 | ILE | 726 | 1 |
| ARG | 385 | 1 | LEU | 727 | 1 |
| GLU | 386 | 1 | TYR | 756 | 1 |
| VAL | 387 | 1 | PHE | 759 | 1 |
|     |     |   | LYS | 776 | 1 |
|     |     |   | ALA | 890 | 1 |
|     |     |   | GLY | 891 | 1 |
|     |     |   | LEU | 894 | 1 |

|     |      |   |
|-----|------|---|
| ASP | 936  | 1 |
| SER | 937  | 1 |
| SER | 939  | 1 |
| SER | 940  | 1 |
| THR | 941  | 1 |
| ALA | 942  | 1 |
| SER | 943  | 1 |
| GLY | 946  | 1 |
| LYS | 947  | 1 |
| ASP | 950  | 1 |
| ASN | 969  | 1 |
| ALA | 972  | 1 |
| VAL | 991  | 1 |
| ASP | 994  | 1 |
| THR | 998  | 1 |
| LEU | 1001 | 1 |
| GLN | 1005 | 1 |
| GLN | 1010 | 1 |
| LEU | 1012 | 1 |
| ILE | 1013 | 1 |
| ALA | 1016 | 1 |
| ARG | 1019 | 1 |
| SER | 1021 | 1 |
| ALA | 1025 | 1 |
| LYS | 1028 | 1 |
| ARG | 1039 | 1 |
| PHE | 1042 | 1 |
| LYS | 1045 | 1 |
| GLU | 1144 | 1 |
| LEU | 1152 | 1 |
| LYS | 1157 | 1 |
| THR | 1160 | 1 |
| VAL | 1176 | 1 |
| ILE | 1179 | 1 |
| GLN | 1208 | 1 |
| TYR | 1215 | 1 |
| GLY | 1219 | 1 |
| LEU | 1224 | 1 |
| ILE | 1227 | 1 |
| VAL | 1228 | 1 |
| MET | 1237 | 1 |
| CYS | 1241 | 1 |
| SER | 1242 | 1 |
| CYS | 1243 | 1 |
| LEU | 1270 | 1 |

---

Note: Binding amino acids with the highest occurrence are highlighted in bold.

**Table S22.** Key Binding Amino Acids in the Human CD46 and SARS-CoV-2 Envelope Protein (EP), Membrane Protein (MP), Nucleocapsid Protein (NP), and Spike Protein (SP) Protein-Protein Complexes.

| Amino Acid                  | Position | Occurrence | Amino Acid                                        | Position | Occurrence |
|-----------------------------|----------|------------|---------------------------------------------------|----------|------------|
| CD46↔EP Complex             |          |            |                                                   |          |            |
| Human CD46 - 11 amino acids |          |            | SARS-CoV-2 Envelope Protein (EP) - 15 amino acids |          |            |
| THR                         | 188      | 3          | PHE                                               | 20       | 6          |
| TYR                         | 189      | 3          | ILE                                               | 13       | 5          |
| SER                         | 190      | 3          | VAL                                               | 5        | 4          |
| CYS                         | 191      | 3          | THR                                               | 9        | 4          |
| PRO                         | 193      | 3          | LEU                                               | 12       | 4          |
| PHE                         | 200      | 3          | SER                                               | 16       | 4          |
| LEU                         | 202      | 3          | VAL                                               | 17       | 4          |
| GLU                         | 205      | 3          | LEU                                               | 19       | 4          |
| SER                         | 206      | 3          | PHE                                               | 23       | 4          |
| THR                         | 207      | 3          | LEU                                               | 27       | 4          |
| TYR                         | 247      | 3          | VAL                                               | 29       | 4          |
|                             |          |            | LEU                                               | 34       | 4          |
|                             |          |            | ARG                                               | 38       | 4          |
|                             |          |            | ASN                                               | 45       | 4          |
|                             |          |            | ASN                                               | 66       | 4          |
| CD46↔MP Complex             |          |            |                                                   |          |            |
| Human CD46 - 19 amino acids |          |            | MP SARS-CoV-2 – 18 amino acids                    |          |            |
| PHE                         | 11       | 4          | VAL                                               | 60       | 7          |
| PRO                         | 12       | 4          | PRO                                               | 59       | 6          |
| TRP                         | 14       | 4          | ALA                                               | 63       | 6          |
| PHE                         | 16       | 4          | VAL                                               | 66       | 6          |
| PRO                         | 17       | 4          | VAL                                               | 70       | 6          |
| LEU                         | 20       | 4          | ASP                                               | 3        | 5          |
| MET                         | 24       | 4          | LEU                                               | 56       | 5          |
| VAL                         | 25       | 4          | LEU                                               | 67       | 5          |
| LEU                         | 26       | 4          | PHE                                               | 96       | 5          |
| LEU                         | 27       | 4          | MET                                               | 1        | 4          |
| TYR                         | 29       | 4          | LEU                                               | 13       | 4          |
| PHE                         | 31       | 4          | TRP                                               | 20       | 4          |
| GLU                         | 36       | 4          | LEU                                               | 57       | 4          |
| ASN                         | 83       | 4          | LEU                                               | 62       | 4          |
| THR                         | 85       | 4          | TYR                                               | 71       | 4          |
| ILE                         | 239      | 4          | ILE                                               | 82       | 4          |
| TYR                         | 247      | 4          | LEU                                               | 90       | 4          |
| THR                         | 251      | 4          | TRP                                               | 92       | 4          |
| VAL                         | 269      | 4          |                                                   |          |            |
| CD46↔NP Complex             |          |            |                                                   |          |            |
| Human CD46 – 31 amino acids |          |            | NP SARS-CoV-2 – 31 amino acids                    |          |            |
| ASP                         | 343      | 5          | PHE                                               | 17       | 4          |
| VAL                         | 344      | 5          | SER                                               | 21       | 4          |
| TRP                         | 345      | 5          | SER                                               | 79       | 4          |
| TYR                         | 247      | 4          | HIS                                               | 145      | 4          |
| SER                         | 341      | 4          | GLY                                               | 212      | 4          |
| LEU                         | 342      | 4          | ASP                                               | 216      | 4          |

|     |     |   |     |     |   |
|-----|-----|---|-----|-----|---|
| VAL | 346 | 4 | THR | 334 | 4 |
| VAL | 351 | 4 | GLY | 335 | 4 |
| TYR | 132 | 3 | ALA | 336 | 4 |
| ALA | 194 | 3 | ASP | 81  | 3 |
| PRO | 199 | 3 | ASP | 82  | 3 |
| GLU | 205 | 3 | ASN | 140 | 3 |
| TRP | 216 | 3 | THR | 141 | 3 |
| ARG | 218 | 3 | ALA | 211 | 3 |
| PHE | 242 | 3 | ASN | 213 | 3 |
| LYS | 245 | 3 | LEU | 219 | 3 |
| ILE | 338 | 3 | LEU | 223 | 3 |
| LEU | 339 | 3 | ARG | 259 | 3 |
| ASP | 340 | 3 | ARG | 277 | 3 |
| ILE | 347 | 3 | PRO | 279 | 3 |
| ALA | 353 | 3 | GLN | 281 | 3 |
| ILE | 354 | 3 | THR | 282 | 3 |
| VAL | 355 | 3 | GLN | 283 | 3 |
| ALA | 359 | 3 | GLY | 284 | 3 |
| VAL | 360 | 3 | ASN | 285 | 3 |
| TYR | 366 | 3 | PHE | 286 | 3 |
| TYR | 368 | 3 | ILE | 304 | 3 |
| TYR | 378 | 3 | PRO | 309 | 3 |
| THR | 380 | 3 | PHE | 314 | 3 |
| THR | 383 | 3 | TYR | 333 | 3 |
| HIS | 384 | 3 | ILE | 337 | 3 |

#### CD46↔SP Complex

| Human CD46 - 28 amino acids |     |   | SP SARS-CoV-2 – 16 amino acids |      |   |
|-----------------------------|-----|---|--------------------------------|------|---|
| ARG                         | 218 | 5 | VAL                            | 3    | 5 |
| GLN                         | 122 | 4 | LEU                            | 5    | 5 |
| GLU                         | 177 | 4 | MET                            | 1    | 4 |
| ALA                         | 219 | 4 | PHE                            | 2    | 4 |
| LYS                         | 249 | 4 | PHE                            | 4    | 3 |
| TYR                         | 131 | 3 | VAL                            | 6    | 3 |
| VAL                         | 178 | 3 | ASP                            | 198  | 3 |
| PRO                         | 199 | 3 | GLY                            | 199  | 3 |
| GLU                         | 205 | 3 | GLN                            | 271  | 3 |
| VAL                         | 215 | 3 | SER                            | 375  | 3 |
| TRP                         | 216 | 3 | ASP                            | 405  | 3 |
| SER                         | 217 | 3 | ARG                            | 408  | 3 |
| SER                         | 240 | 3 | GLY                            | 502  | 3 |
| PHE                         | 242 | 3 | VAL                            | 503  | 3 |
| LYS                         | 244 | 3 | LEU                            | 1145 | 3 |
| TYR                         | 248 | 3 | ASP                            | 1146 | 3 |
| LYS                         | 293 | 3 |                                |      |   |
| PRO                         | 295 | 3 |                                |      |   |
| LEU                         | 342 | 3 |                                |      |   |
| TRP                         | 345 | 3 |                                |      |   |
| ILE                         | 347 | 3 |                                |      |   |
| VAL                         | 351 | 3 |                                |      |   |
| ALA                         | 353 | 3 |                                |      |   |

|     |     |   |
|-----|-----|---|
| VAL | 355 | 3 |
| GLY | 357 | 3 |
| ALA | 359 | 3 |
| VAL | 360 | 3 |
| PHE | 389 | 3 |

**Table S23.** Quality Assessment of 3D Models of Human CD46 and SARS-CoV-2 Envelope Protein (EP) Protein-Protein Complexes Obtained Using Different Software Tools.

| Program       | Number of Key Binding Amino Acids |          |                      |          | Percentage of Key Binding Amino Acids <sup>3</sup> |                 |                         |                      |                  |
|---------------|-----------------------------------|----------|----------------------|----------|----------------------------------------------------|-----------------|-------------------------|----------------------|------------------|
|               | CD46_EP <sup>1</sup>              |          | EP_CD46 <sup>2</sup> |          |                                                    |                 |                         |                      |                  |
|               | CD46                              | EP       | CD46                 | EP       | CD46 <sup>4</sup>                                  | EP <sup>5</sup> | CD46_EP <sup>6</sup>    | EP_CD46 <sup>7</sup> | All <sup>8</sup> |
| ClusPro2      | 11                                | 9        | 0                    | 0        | 50.0                                               | 30.0            | 76.9                    | 0.0                  | 38.5             |
| <b>GRAMM1</b> | <b>11</b>                         | <b>4</b> | <b>11</b>            | <b>4</b> | <b>100.0</b>                                       | <b>26.7</b>     | <b>57.7<sup>9</sup></b> | <b>57.7</b>          | <b>57.7</b>      |
| Hex8          | 0                                 | 1        | 0                    | 2        | 0.0                                                | 10.0            | 3.8                     | 7.7                  | 5.8              |
| SwarmDock     | 0                                 | 9        | 0                    | 10       | 0.0                                                | 63.3            | 34.6                    | 38.5                 | 36.5             |
| ZDock3        | 0                                 | 12       | 0                    | 12       | 0.0                                                | 80.0            | 46.2                    | 46.2                 | 46.2             |

Note: 1. In separate subunits of the CD46(receptor)–EP(ligand) complex; 2. In separate subunits of the EP(receptor)–CD46(ligand) complex; 3. Out of the total number of key binding amino acids; 4. In the CD46 subunit of both models; 5. In the EP subunit of both models; 6. In the CD46 (receptor)–EP(ligand) complex; 7. In the EP(receptor)–CD46 (ligand) complex; 8. In both dimeric complexes; 9. Best 3D model.

**Table S24.** Quality Assessment of 3D Models of Human CD46 and SARS-CoV-2 Membrane Protein (MP) Protein-Protein Complexes Obtained Using Different Software Tools.

| Program       | Number of Key Binding Amino Acids |           |                      |           | Percentage of Key Binding Amino Acids <sup>3</sup> |                 |                         |                      |                  |
|---------------|-----------------------------------|-----------|----------------------|-----------|----------------------------------------------------|-----------------|-------------------------|----------------------|------------------|
|               | CD46_MP <sup>1</sup>              |           | MP_CD46 <sup>2</sup> |           |                                                    |                 |                         |                      |                  |
|               | CD46                              | MP        | CD46                 | MP        | CD46 <sup>4</sup>                                  | MP <sup>5</sup> | CD46_MP <sup>6</sup>    | MP_CD46 <sup>7</sup> | All <sup>8</sup> |
| ClusPro2      | 15                                | 7         | 15                   | 8         | 78.9                                               | 41.7            | 59.5                    | 62.2                 | 60.8             |
| GRAMM1        | 4                                 | 5         | 4                    | 12        | 21.1                                               | 47.2            | 24.3                    | 43.2                 | 33.8             |
| Hex8          | 0                                 | 0         | 0                    | 0         | 0.0                                                | 0.0             | 0.0                     | 0.0                  | 0.0              |
| SwarmDock     | 4                                 | 14        | 4                    | 13        | 21.1                                               | 75.0            | 48.6                    | 45.9                 | 47.3             |
| <b>ZDock3</b> | <b>15</b>                         | <b>14</b> | <b>15</b>            | <b>14</b> | <b>78.9</b>                                        | <b>77.8</b>     | <b>78.4<sup>9</sup></b> | <b>78.4</b>          | <b>78.4</b>      |

Note: 1. In separate subunits of the CD46(receptor)–MP(ligand) complex; 2. In separate subunits of the MP(receptor)–CD46(ligand) complex; 3. Out of the total number of key binding amino acids; 4. In the CD46 subunit of both models; 5. In the MP subunit of both models; 6. In the CD46 (receptor)–MP(ligand) complex; 7. In the MP(receptor)–CD46 (ligand) complex; 8. In both dimeric complexes; 9. Best 3D model.

**Table S25.** Quality Assessment of 3D Models of Human CD46 and SARS-CoV-2 Nucleocapsid Protein (NP) Protein-Protein Complexes Obtained Using Different Software Tools.

| Program       | Number of Key Binding Amino Acids |          |                      |          | Percentage of Key Binding Amino Acids <sup>3</sup> |                 |                         |                      |                  |
|---------------|-----------------------------------|----------|----------------------|----------|----------------------------------------------------|-----------------|-------------------------|----------------------|------------------|
|               | CD46_NP <sup>1</sup>              |          | NP_CD46 <sup>2</sup> |          |                                                    |                 |                         |                      |                  |
|               | CD46                              | NP       | CD46                 | NP       | CD46 <sup>4</sup>                                  | NP <sup>5</sup> | CD46_NP <sup>6</sup>    | NP_CD46 <sup>7</sup> | All <sup>8</sup> |
| ClusPro2      | 0                                 | 17       | 0                    | 17       | 0.0                                                | 54.8            | 27.4                    | 27.4                 | 27.4             |
| GRAMM1        | 12                                | 6        | 18                   | 12       | 48.4                                               | 29.0            | 29.0                    | 48.4                 | 38.7             |
| Hex8          | 4                                 | 2        | 4                    | 6        | 12.9                                               | 12.9            | 9.7                     | 16.1                 | 12.9             |
| SwarmDock     | 21                                | 22       | 5                    | 4        | 41.9                                               | 41.9            | 69.4                    | 14.5                 | 41.9             |
| <b>ZDock3</b> | <b>20</b>                         | <b>8</b> | <b>20</b>            | <b>8</b> | <b>64.5</b>                                        | <b>25.8</b>     | <b>45.2<sup>9</sup></b> | <b>45.2</b>          | <b>45.2</b>      |

Note: 1. In separate subunits of the CD46(receptor)–NP(ligand) complex; 2. In separate subunits of the NP(receptor)–CD46(ligand) complex; 3. Out of the total number of key binding amino acids; 4. In the CD46 subunit of both models; 5. In the NP subunit of both models; 6. In the CD46 (receptor)–NP(ligand) complex; 7. In the NP(receptor)–CD46 (ligand) complex; 8. In both dimeric complexes; 9. Best 3D model.

**Table S26.** Quality Assessment of 3D Models of Human CD46 and SARS-CoV-2 Spike Protein (SP) Protein-Protein Complexes Obtained Using Different Software Tools.

| Program       | Number of Key Binding Amino Acids |           |                      |           | Percentage of Key Binding Amino Acids <sup>3</sup> |                 |                         |                      |                  |
|---------------|-----------------------------------|-----------|----------------------|-----------|----------------------------------------------------|-----------------|-------------------------|----------------------|------------------|
|               | CD46_SP <sup>1</sup>              |           | SP_CD46 <sup>2</sup> |           |                                                    |                 |                         |                      |                  |
|               | CD46                              | SP        | CD46                 | SP        | CD46 <sup>4</sup>                                  | SP <sup>5</sup> | CD46_SP <sup>6</sup>    | SP_CD46 <sup>7</sup> | All <sup>8</sup> |
| ClusPro2      | 12                                | 2         | 11                   | 2         | 41.1                                               | 12.5            | 31.8                    | 29.5                 | 30.7             |
| GRAMM1        | 8                                 | 7         | 2                    | 3         | 17.9                                               | 31.3            | 34.1                    | 11.4                 | 22.7             |
| Hex8          | 9                                 | 0         | 6                    | 0         | 26.8                                               | 0.0             | 20.5                    | 13.6                 | 17.0             |
| SwarmDock     | 14                                | 9         | 8                    | 5         | 39.3                                               | 43.8            | 52.3                    | 29.5                 | 40.9             |
| <b>ZDock3</b> | <b>10</b>                         | <b>13</b> | <b>10</b>            | <b>13</b> | <b>35.7</b>                                        | <b>81.3</b>     | <b>52.3<sup>9</sup></b> | <b>52.3</b>          | <b>52.3</b>      |

Note: 1. In separate subunits of the CD46(receptor)–SP(ligand) complex; 2. In separate subunits of the SP(receptor)–CD46(ligand) complex; 3. Out of the total number of key binding amino acids; 4. In the CD46 subunit of both models; 5. In the SP subunit of both models; 6. In the CD46 (receptor)–SP(ligand) complex; 7. In the SP(receptor)–CD46 (ligand) complex; 8. In both dimeric complexes; 9. Best 3D model.

**Table S27.** Key Binding Amino Acids in the Interaction Regions of Subunits in the Best Valid 3D Models of Human CD46 and SARS-CoV-2 Envelope Protein (EP), Membrane Protein (MP), Nucleocapsid Protein (NP), and Spike Protein (SP) Protein-Protein Complexes.

| Model          | Key Binding Amino Acids                                                                                                                                        |                                                                                                |
|----------------|----------------------------------------------------------------------------------------------------------------------------------------------------------------|------------------------------------------------------------------------------------------------|
|                | CD                                                                                                                                                             | Second Subunit                                                                                 |
| CD46_EP_GRAMM1 | THR188, TYR189, SER190, CYS191, PRO193, PHE200, LEU202, GLU205, SER206, THR207, TYR247                                                                         | ILE13, VAL17, PHE20, VAL29                                                                     |
| CD46_MP_ZDock3 | PHE11, PRO12, TRP14, PHE16, PRO17, LEU20, MET24, VAL25, LEU26, LEU27, TYR29, PHE31, GLU36, ASN83, THR85                                                        | MET1, ASP3, LEU56, LEU57, PRO59, VAL60, LEU62, ALA63, VAL66, LEU67, VAL70, TYR71, TRP92, PHE96 |
| CD46_NP_ZDock3 | ILE338, SER341, LEU342, ASP343, VAL344, TRP345, VAL346, ILE347, VAL351, ALA353, ILE354, VAL355, ALA359, VAL360, TYR366, TYR368, TYR378, THR380, THR383, HIS384 | PHE17, SER21, ALA211, GLY212, ASN213, ASP216, LEU219, LEU223                                   |

CD46\_SP\_ZDock3

GLU177, VAL178, PRO199, GLU205,  
ARG218, SER240, TYR248, LYS249,  
LYS293, PRO295

MET1, PHE2, VAL3, PHE4, LEU5,  
VAL6, ASP198, GLY199, SER375,  
ASP405, ARG408, GLY502,  
VAL503
